# Supplementary material
Source: PubMed Central journal article supplement (PMC9630775)
Supplement: mmc1.pdf [file mmc1.pdf]

**OMTM, Volume 27**

**Supplemental information**

**SARS-CoV-2 infection increases**

**the gene expression profile**

**for Alzheimer's disease risk**

**Ryan Green, Karthick Mayilsamy, Andrew R. McGill, Taylor E. Martinez, Bala Chandran, Laura J. Blair, Paula C. Bickford, Shyam S. Mohapatra, and Subhra Mohapatra**

## Supplementary Methods and Figures

### Immune cell profiling with CIBERSORT

To estimate the relative percentage of different immune cell types in COVID-19 brains compared to control, we used CIBERSORTx. CIBERSORTx is an analytical tool that provides an estimation of the abundances of member cell types in a mixed cell population using gene expression data. Mapped read counts for each patient sample were input into CIBERSORT along with the standard “LM22” gene signature file. CIBERSORT output is displayed as fractional proportions of each immune cell sub-population as well as the overall proportion of immune cells within each sample.

**Table S1** Differentially expressed genes depicted in figure 1C.

Please see supplementary spreadsheet file for table S1.

**Table S2** Fold change and p value of ADRD pathology genes in COVID-19 brains

| Gene     | log(fold change) | Adj p value |
|----------|------------------|-------------|
| CTCF     | 1.239            | 2.43E-03    |
| CXCL8    | 1.129            | 7.31E-03    |
| IFITM3   | 1.075            | 1.85E-03    |
| LGALS3   | 1.071            | 3.66E-04    |
| IFI16    | 1.026            | 5.21E-04    |
| C4A/C4B  | 0.963            | 2.36E-02    |
| FKBP5    | 0.938            | 1.89E-03    |
| C5AR1    | 0.913            | 2.91E-02    |
| IL18     | 0.864            | 4.41E-03    |
| GFAP     | 0.832            | 1.61E-02    |
| PLAT     | 0.806            | 1.39E-02    |
| C4B_2    | 0.79             | 4.93E-02    |
| IL6R     | 0.786            | 2.52E-02    |
| CAV1     | 0.733            | 3.84E-02    |
| KLF4     | 0.706            | 4.93E-02    |
| STAT3    | 0.611            | 3.89E-02    |
| EGFR     | 0.521            | 2.51E-02    |
| HSP90AB1 | -0.41            | 2.68E-02    |
| HSP90AA1 | -0.431           | 2.09E-02    |
| APP      | -0.468           | 4.31E-03    |
| CALB1    | -0.572           | 3.20E-02    |
| HSPA8    | -0.579           | 3.07E-03    |
| CCKBR    | -0.77            | 1.59E-02    |
| BDNF     | -0.824           | 3.14E-02    |
| CAMKK2   | -0.858           | 2.99E-04    |
| TAC1     | -1.424           | 5.14E-07    |

**Table S3** Hub genes identified in protein interaction network of COVID brain samples using STRING database and CytoHubba.

| Matching Algorithms | Gene     |
|---------------------|----------|
| 3                   | CCL2     |
| 3                   | CXCL8    |
| 3                   | NFKBIA   |
| 3                   | PTPRC    |
| 3                   | STAT1    |
| 3                   | STAT3    |
| 3                   | TLR2     |
| 2                   | APP      |
| 2                   | CAV1     |
| 2                   | CXCL2    |
| 2                   | EGFR     |
| 2                   | EZH2     |
| 2                   | HRAS     |
| 2                   | HSP90AA1 |
| 2                   | HSP90AB1 |
| 2                   | ITGB1    |
| 2                   | LRRK2    |
| 2                   | MYC      |
| 2                   | SMARCA4  |

**Table S4.** qPCR Primer Sequences

|    | Gene                 | Forward Primer           | Reverse primer          |
|----|----------------------|--------------------------|-------------------------|
| 1  | SARS-CoV-2 N protein | CACATTGGCACCCGCAATC      | GAGGAACGAGAAGAGGCTTG    |
| 2  | IL-6                 | TACCACTTCACAAGTCGGAGGC   | CTGCAAGTGCATCATCGTTGTTC |
| 3  | IL-1 $\beta$         | TGGACCTTCCAGGATGAGGACA   | GTTTCATCTCGGAGCCTGTAGTG |
| 4  | TNF $\alpha$         | GGTGCCTATGTCTCAGCCTCTT   | GCCATAGAAGTATGAGAGGGAG  |
| 5  | CCL20                | ATGGCCTGCGGTGGCAAGCGTCTG | TAGGCTGAGGAGGTTACAGCCCT |
| 6  | NLRP3                | TCACAACTCGCCCAAGGAGGAA   | AAGAGACCACGGCAGAAGCTAG  |
| 7  | IFITM3               | TTCTGCTGCCTGGGCTTCATAG   | ACCAAGGTGCTGATGTTTCAGGC |
| 8  | CR1                  | ATGAAAGGAGCCAGCAGTGTGC   | GGAATCCACTCATCTCCTGAGG  |
| 9  | FKBP5                | GATTGCCGAGATGTGGTGTTTCG  | GGCTTCTCCAAAACCATAGCGTG |
| 10 | C5AR1                | CCATTAGTGCCGACCGTTTCCT   | CACGAAGGATGGAATGGTGAGG  |
| 11 | IFI 204              | CCAGTCACCAATACTCCACAGC   | CTCTGAGTGGAGAACAGCACCT  |

**Table S5.** Primary antibodies, corresponding secondary antibodies, and associated information

| Primary antibody                    | Source                          | Catalogue number | Dilution | Secondary antibody                                      | Source                                           | Catalogue number   | Dilution      | Development       |
|-------------------------------------|---------------------------------|------------------|----------|---------------------------------------------------------|--------------------------------------------------|--------------------|---------------|-------------------|
| Anti-Tau (phospho T231) antibody    | Abcam, Cambridge, MA            | ab151559         | 1-100    | Biotinylated goat antirabbit/Alexafluor 488 anti rabbit | Vector Laboratories Inc., / Abcam, Cambridge, MA | BA-1000/ /AB150077 | 1:400/ 1-1000 | DAB/ Fluorescence |
| Anti-Tau (T22), oligomeric Antibody | Millipore, Temecula, California | ABN454           | 1-200    | Biotinylated goat antirabbit                            | Vector Laboratories Inc.,                        | BA-1000            | 1:400         | DAB               |
| Anti-FKBP5 antibody                 | R&D systems                     | AF4094           | 1-300    | Biotinylated swine antigoat                             | Southern Biotech                                 | Biotech 4050-08    | 1-500         | DAB               |
| Anti-CD31 antibody                  | Invitrogen                      | 14-0311-82       | 1-500    | Goat Anti-Rat IgG H&L (Alexa Fluor® 594)                | Abcam, Cambridge, MA                             | ab150160           | 1-1000        | Fluorescence      |
| Caspase 1 p20 (Cleaved Asp296)      | Thermo Scientific               | PA599390         | 1-250    | Alexafluor 594 anti rabbit                              | Abcam, Cambridge, MA                             | A32740             | 1:400/ 1-1000 | Fluorescence      |

Figure S1

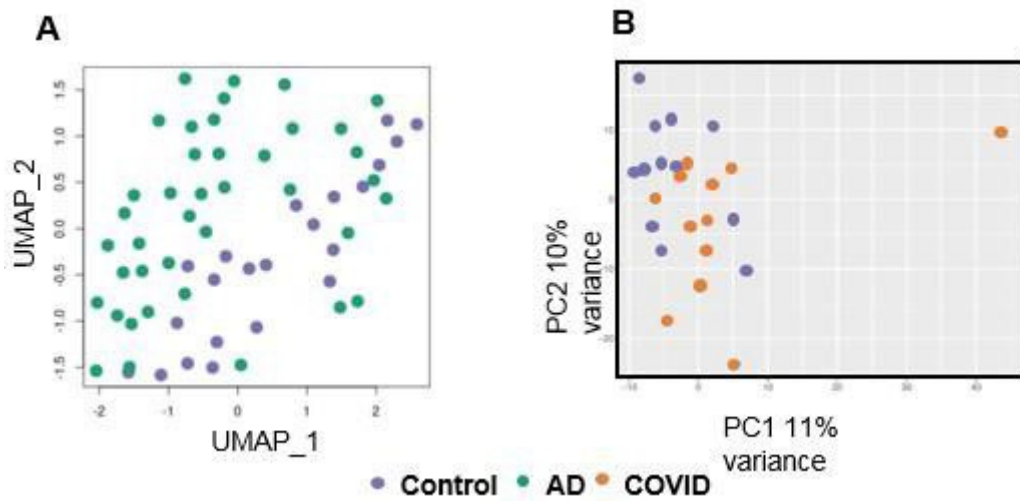

**Figure S1. Dimensionality reduction and clustering of individual patient samples.** **A.** Uniform Manifold Approximation and Projection (UMAP) clustering of individual AD vs control sample. **B.** Principle component (PC) clustering of individual COVID-19 vs control samples.

Figure S2.

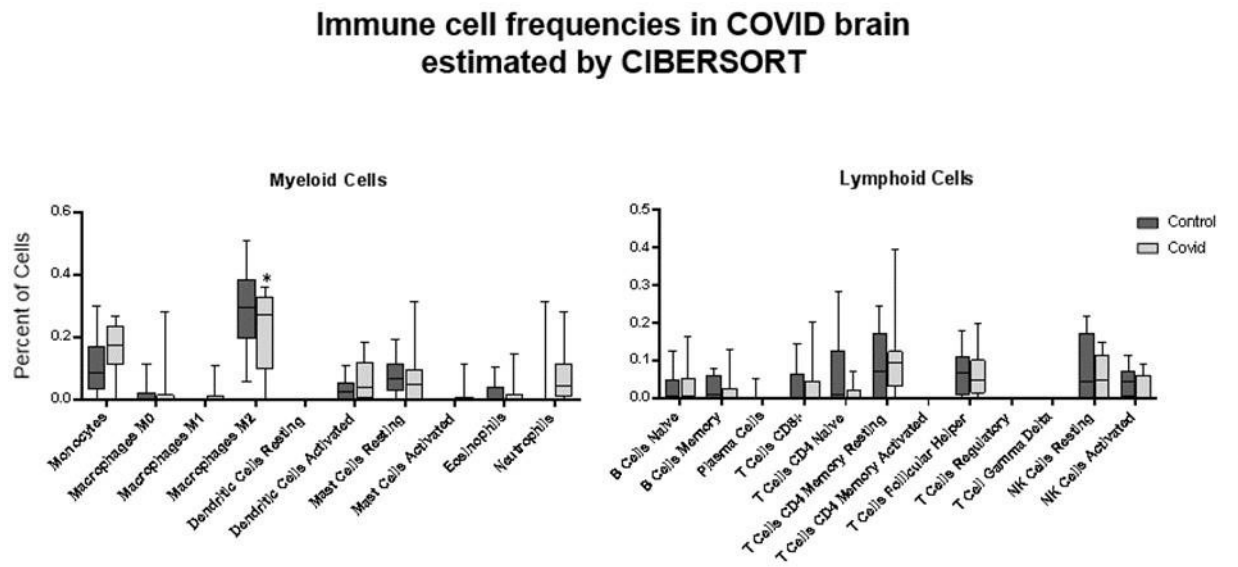

**Figure S2.** Immune cell types present in COVID and control brains as estimated from sequencing data with CIBERSORT.

Figure S3

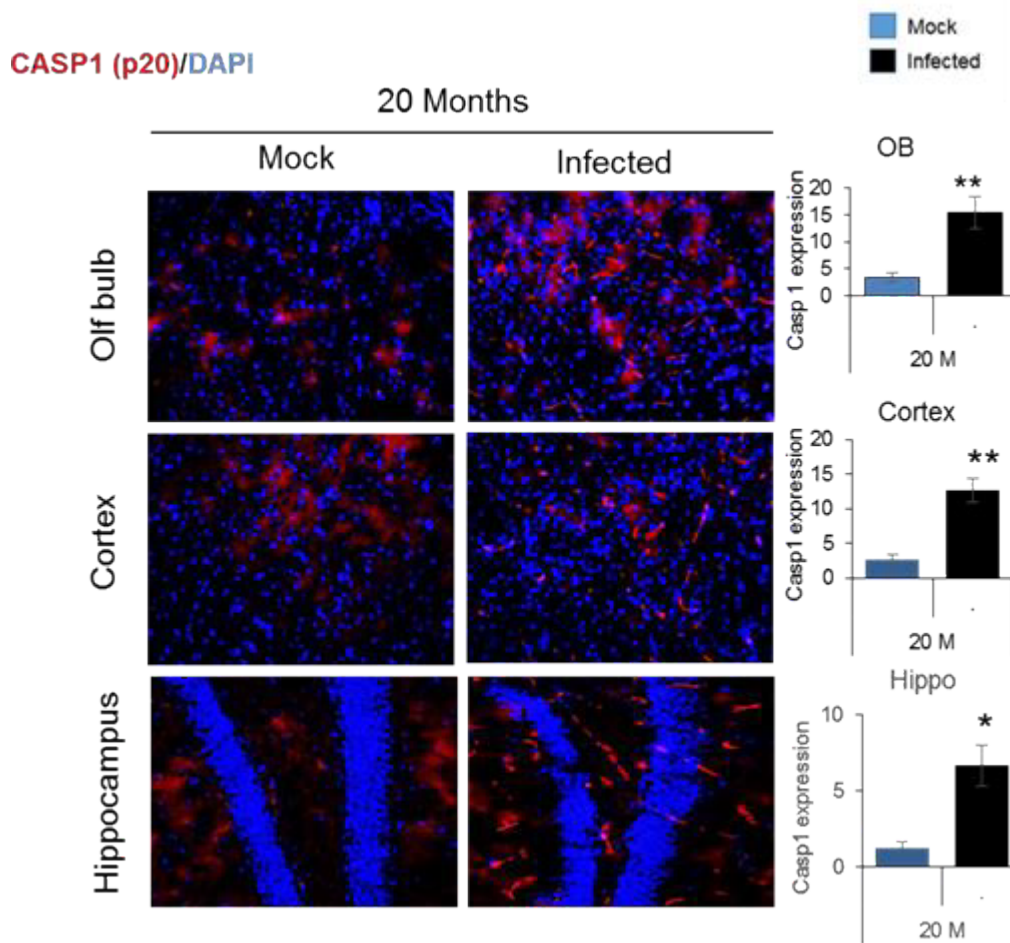

**Figure S3. SARS-CoV-2 infection induces Casp1(p20) expression in Aged Mice.** Immunostaining and Histogram showing Caspase1 expression in infected brain –olfactory bulb, cortex, hippocampus, n=3/ group, data expressed as mean  $\pm$  SEM, \* Compared to respective mock, \* $p < 0.05$ , \*\* $p < 0.005$

## Figure S4

Figure S4

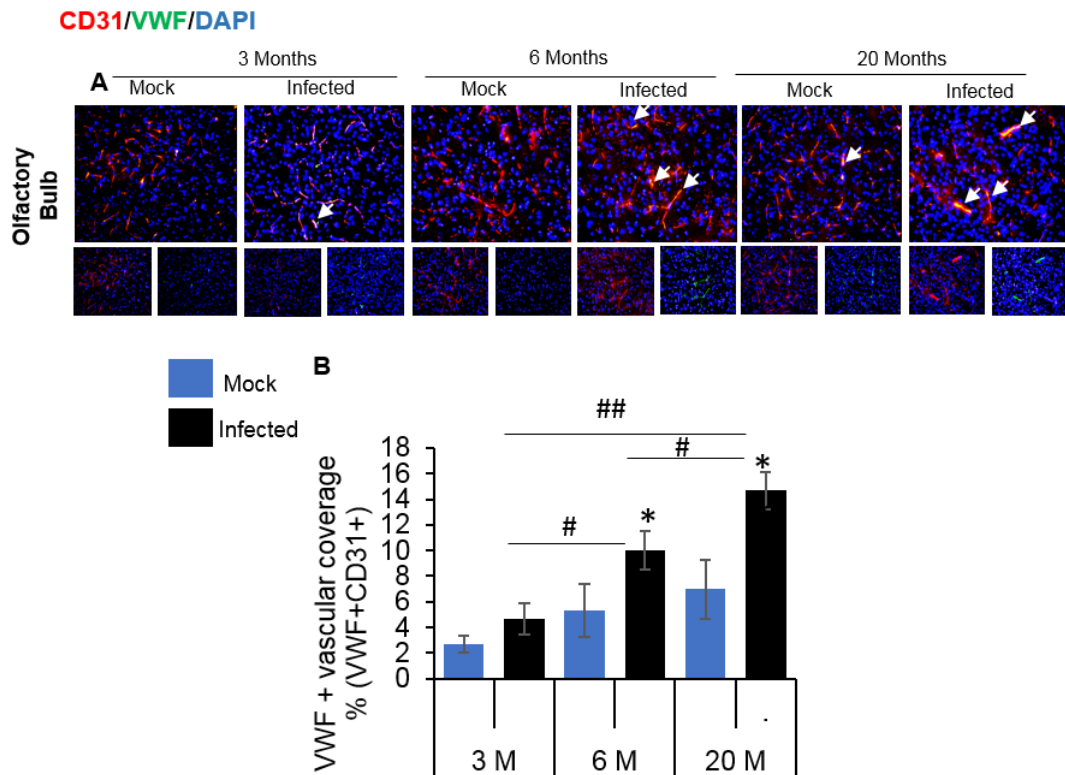

**Figure S4. CD31 and VWF staining of MA10 infected mouse brains: C57Bl/6 3, 6 and 20 month old mice were infected with SARS CoV2 MA10 virus- 100k PFU. A.** Representative images showing the expression of CD31 (marker for endothelial cells) and VWF (von Willebrand factor marker for vascular damage) in olfactory bulb. Upper panel: co localization of CD31 (RFP) and VWF (GFP) depicting vascular damage shown by arrows, lower panel: CD31 (RFP) and VWF (GFP). **B.** Histogram representing the quantification of VWF+ vascular coverage (% VWF expression with respect to CD31 expression).  $n = 3$ , Data expressed as mean  $\pm$  SEM, \* Compared to control  $p < 0.05$ , ##,  $p < 0.005$ ,



**Figure S5**

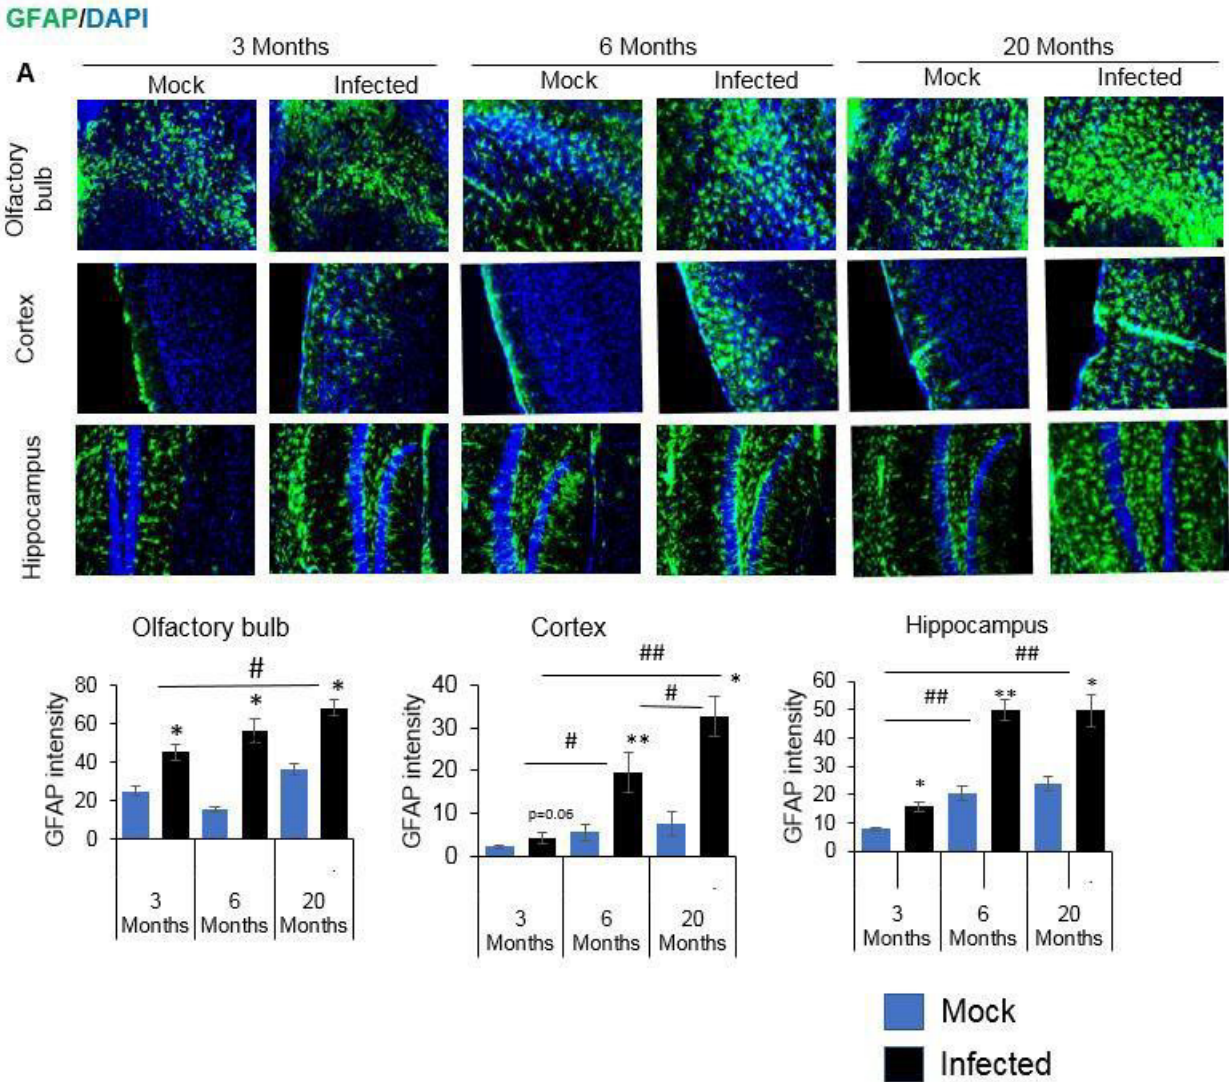

**Figure S5. SARS-CoV-2 MA 10 infection induces gliosis in olfactory bulb, cortex and hippocampus of 6 and 20 Months aged mice. A.** Immunostaining showing GFAP/DAPI staining in infected brain – olfactory bulb (upper panel), cortex (middle panel) and hippocampus (lower panel) at 18 DPI, **B.** histogram representing quantification of GFAP immunoreactivity (Intden/unit area), n=3/ group, data expressed as mean  $\pm$  SEM, \* Compared to respective mock, # Compared to infection \*,#p<0.05, \*\*,## p<0.005

**Figure S6**

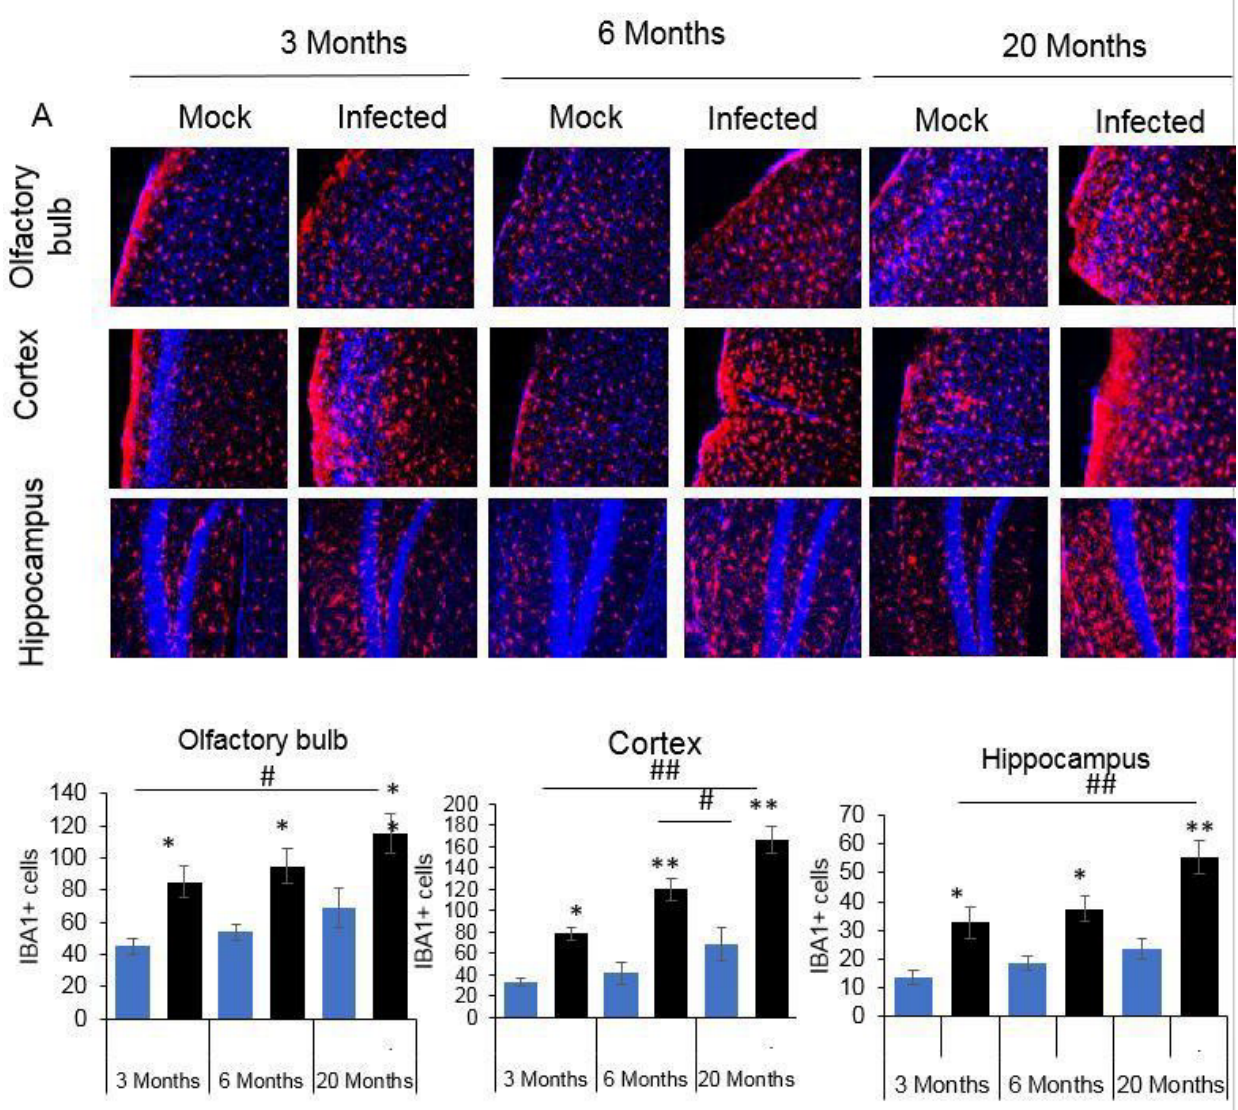

**Figure S6. SARS-CoV-2 MA 10 infection induces gliosis in olfactory bulb, cortex and hippocampus of 6 and 20 Months aged mice. A.** Immunostaining showing IBA1 (red)/DAPI staining in infected brain – olfactory bulb (upper panel), cortex (middle panel) and hippocampus (lower panel), at 18 DPI, **B.** histogram representing quantification of IBA1+ cells , n=3/ group, data expressed as mean ± SEM, \* Compared to respective mock, # Compared to infection \*, p<0.05, \*\*, ## p<0.005,\*\*\*,

Figure S7

MBP  
staining

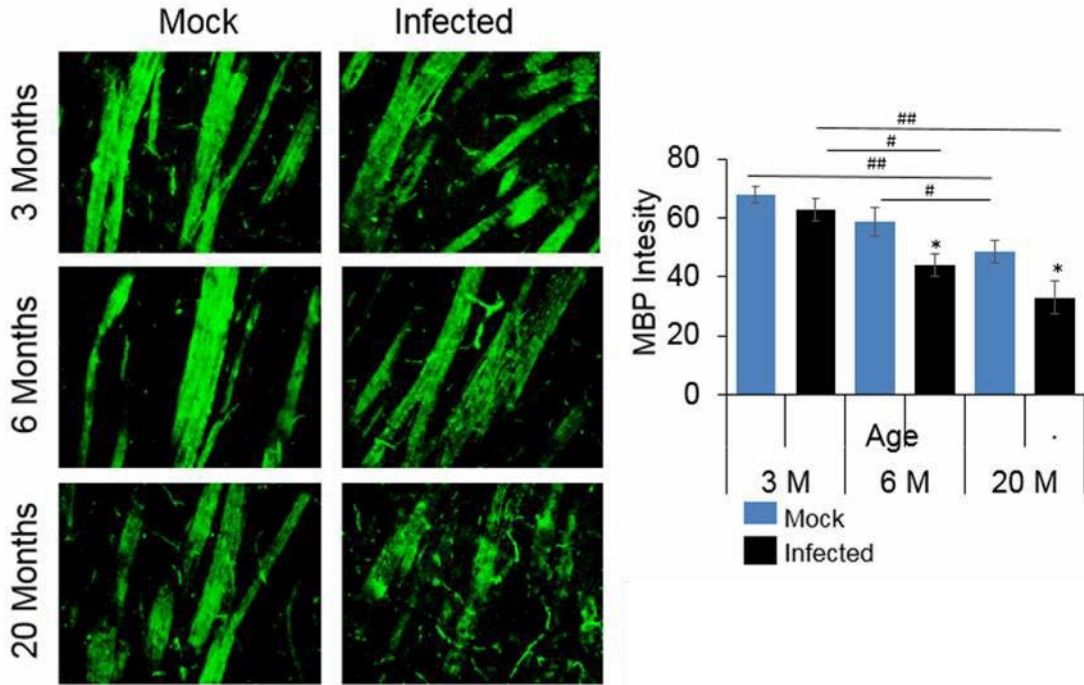

**Figure S7. SARS-CoV-2 infection induces demyelination in Aged Mice.** 3, 6 and 20 months aged C57Bl/6 mice were infected with SARS CoV2 MA10 virus- 100k PFU. The infected mice were sacrificed 18 days post infection. **A.** Immunostaining showing MBP staining in infected brain – Striatum, **B.** quantification of immunostaining (MBP intensity), n=3/ group, data expressed as mean  $\pm$  SEM, \* Compared to respective mock, # Compared to infection \*, p<0.05, \*\*, ## p<0.005

**Figure S8**

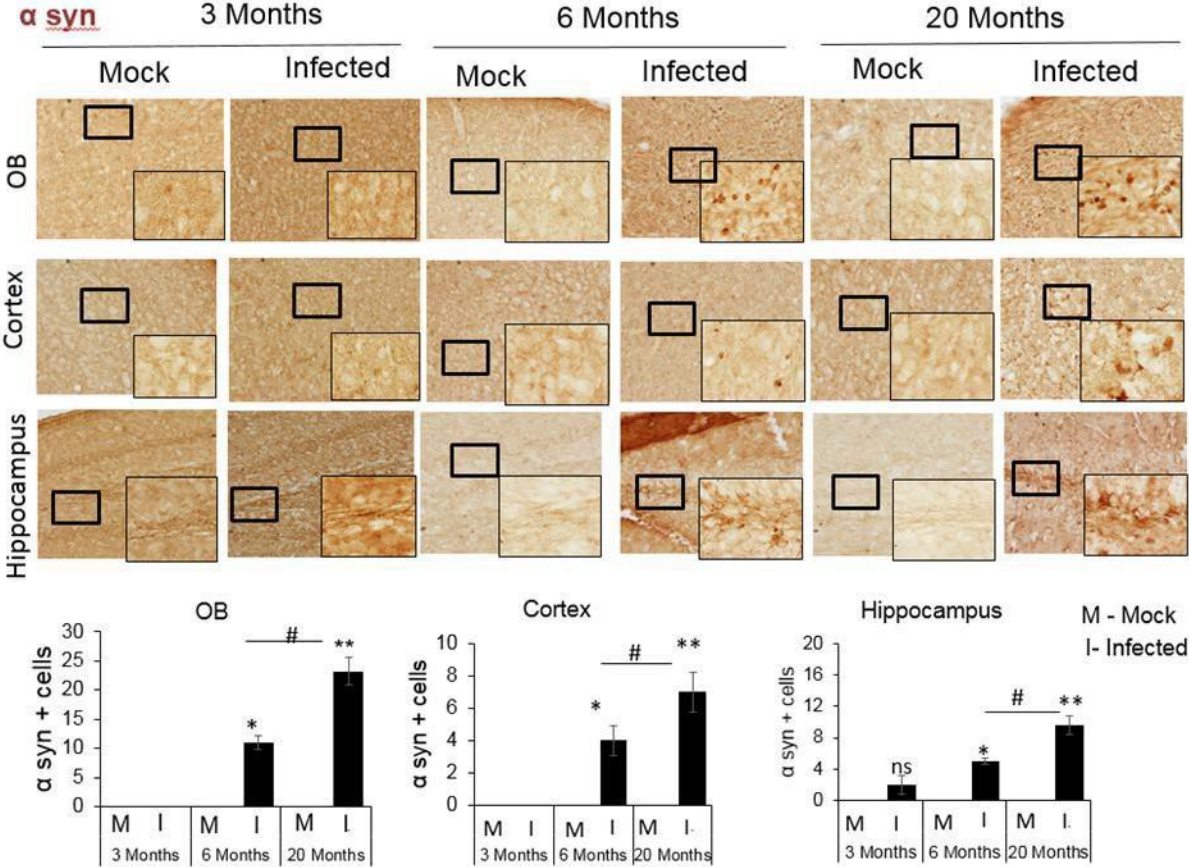

**Figure S8. SARS-CoV-2 infection induces α-synuclein expression in Aged Mice.** 3, 6 and 20 month old C57Bl/6 mice were infected with SARS CoV2 MA10 virus, Immunostaining showing aSyn staining in infected brain – olfactory bulb, cortex and hippocampus, quantification of immunostaining at 18 DPI, n=3/ group, data expressed as mean ± SEM, \* Compared to respective mock, # Compared to infection \*, # p<0.05
