# Supplementary material
Source: PubMed Central journal article supplement (PMC9630775)
Supplement: mmc3.pdf [file mmc3.pdf]

# SARS-CoV-2 infection increases the gene expression profile for Alzheimer's disease risk

Ryan Green,<sup>1,2,5,6</sup> Karthick Mayilsamy,<sup>1,5,6</sup> Andrew R. McGill,<sup>1,2,5</sup> Taylor E. Martinez,<sup>1,5</sup> Bala Chandran,<sup>1</sup> Laura J. Blair,<sup>1,3,5</sup> Paula C. Bickford,<sup>4,5</sup> Shyam S. Mohapatra,<sup>2,5</sup> and Subhra Mohapatra<sup>1,5</sup>

<sup>1</sup>Department of Molecular Medicine, Morsani College of Medicine, University of South Florida, Tampa, FL 33612, USA; <sup>2</sup>Department of Internal Medicine, Morsani College of Medicine, University of South Florida, Tampa, FL 33612, USA; <sup>3</sup>Byrd Alzheimer's Research Institute, University of South Florida, Tampa, FL 33613, USA; <sup>4</sup>Center of Excellence for Aging and Brain Repair, Departments of Neurosurgery and Brain Repair, and Molecular Pharmacology and Physiology, Morsani College of Medicine, Tampa, FL 33613, USA; <sup>5</sup>James A Haley VA Hospital, Tampa, FL 33612, USA

**The coronavirus disease 2019 (COVID-19) pandemic has caused over 600,000,000 infections globally thus far. Up to 30% of individuals with mild to severe disease develop long COVID, exhibiting diverse neurologic symptoms including dementias. However, there is a paucity of knowledge of molecular brain markers and whether these can precipitate the onset of Alzheimer's disease (AD). Herein, we report the brain gene expression profiles of severe COVID-19 patients showing increased expression of innate immune response genes and genes implicated in AD pathogenesis. The use of a mouse-adapted strain of SARS-CoV-2 (MA10) in an aged mouse model shows evidence of viral neurotropism, prolonged viral infection, increased expression of tau aggregator FKBP51, interferon-inducible gene *Ifi204*, and complement genes C4 and C5AR1. Brain histopathology shows AD signatures including increased tau-phosphorylation, tau-oligomerization, and  $\alpha$ -synuclein expression in aged MA10 infected mice. The results of gene expression profiling of SARS-CoV-2-infected and AD brains and studies in the MA10 aged mouse model taken together, for the first time provide evidence suggesting that SARS-CoV-2 infection alters expression of genes in the brain associated with the development of AD. Future studies of common molecular markers in SARS-CoV-2 infection and AD could be useful for developing novel therapies targeting AD.**

## INTRODUCTION

Alzheimer's disease and related dementias (ADRDs) are the most crippling cognitive threat to our aging population. By 2050, it is expected that the United States will spend \$1.2 trillion to maintain the constantly deteriorating quality of life of 16 million Americans with AD,<sup>1</sup> including 5.5 million Americans age 65 and older. There is no effective treatment or cure for ADRDs, and this is partly due to poor understanding of the underlying mechanisms and the diverse risk factors. Clinically, AD manifests as progressive cognitive decline and worsening memory deficits,<sup>2</sup> which have been critically linked to the aberrant accumulation of tau protein in neurons.<sup>3–5</sup>

Inflammation is another common hallmark of ADRD, which can be exacerbated by the state of chronic inflammation triggered by pathological microbes, including viruses and their toxic metabolites. Previously, the “infectious AD hypothesis” was proposed based on the reactivation of neurotropic viruses such as herpes simplex virus (HSV), cytomegalovirus (CMV), and human herpes virus (HHV)6, which caused the deposition of protein aggregates leading to cognition impairment.<sup>6</sup> Also, the 1918 influenza outbreak reportedly resulted in a significant increase in Parkinson's disease cases in years following.<sup>7</sup> Epidemiological and laboratory rodent studies show the potential for respiratory viruses to have a neurological impact, sometimes in the absence of direct viral infection in the central nervous system (CNS).<sup>8</sup> Although the precise mechanisms are poorly understood, it has been suggested that infections induce innate immune activation, causing neuroinflammation, which, in turn, promotes tau pathogenesis.<sup>9–12</sup> Microglia can become activated by tau oligomers, thus promoting a feed-forward cycle of inflammation and neurotoxicity.<sup>13</sup> Once a positive regulatory loop between tau production and inflammation is established, the progression to ADRDs is no longer dependent on the initial cause of inflammation.

Severe acute respiratory syndrome coronavirus 2 (SARS-CoV-2) has caused the coronavirus disease 19 (COVID-19) pandemic with ~600 million confirmed infections thus far<sup>14</sup> and with long-term sequelae (long COVID) presenting in a significant proportion of infected individuals.<sup>15</sup> A subgroup of severe long-COVID cases show a major neurological component with evidence of neuroinvasion correlating with death.<sup>16</sup> About 80% of CoV-2-infected patients show CNS manifestations including dizziness, headache, loss of

Received 23 June 2022; accepted 21 September 2022;  
<https://doi.org/10.1016/j.omtm.2022.09.007>

<sup>†</sup>These authors contributed equally

**Correspondence:** Subhra Mohapatra, Department of Molecular Medicine, Morsani College of Medicine, University of South Florida, Tampa, FL 33612, USA.

**E-mail:** [smohapa2@usf.edu](mailto:smohapa2@usf.edu)

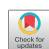

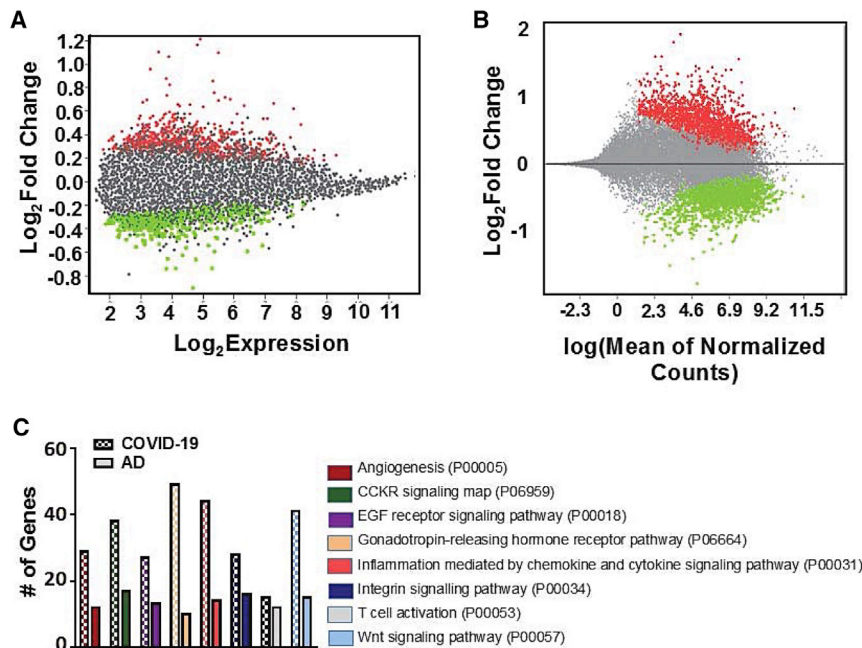

**Figure 1. Transcriptomic changes observed in the frontal cortex of severe COVID and AD brains**

(A) Mean diff plot showing significantly upregulated (red) and downregulated (green) genes in AD brains versus control brains. (B) MA plot showing significantly upregulated (red) and downregulated (green) genes in COVID-19 versus control brains. (C) Differentially expressed genes in each dataset sorted into Gene Ontology (GO) pathways (Panther-db). Pathways containing at least 10 differentially expressed genes from each dataset are shown. Please see [supplemental information](#) for complete gene list.

smell/taste, impaired consciousness, ataxia, epilepsy, encephalitis, and acute cerebrovascular disease, which are 40% more common in severe COVID-19 cases than in mild disease.<sup>17–20</sup> COVID-19 is also associated with ischemic stroke,<sup>21,22</sup> encephalopathy,<sup>19,23</sup> syncope,<sup>24</sup> fluid-attenuated inversion recovery (FLAIR) hyperintensities,<sup>25</sup> and brain stem infections.<sup>26</sup> A comparison of magnetic resonance images (MRIs) in 51- and 81-year-old subjects before and after CoV-2 infections revealed significantly decreased orbitofrontal cortex thickness.<sup>27</sup> Moderate and severe COVID-19 have been associated with changes in brain structure and blood flow.<sup>27,28</sup> Despite progress made, there is a paucity of knowledge regarding the cellular and molecular mechanisms by which the CoV-2 infection impacts the brain. There is an urgent unmet need to identify whether these changes lead to ADRD so that effective therapeutic interventions can be developed to ameliorate risk for ADRD following CoV-2 infection.

Previously, bioinformatic analyses of gene expression changes in COVID-19 patients identified significant immune dysregulation involving complement activation.<sup>29</sup> Also, CoV-2 contains 16 non-structural proteins and 8 open reading frame accessory genes, of which NSP1, *ORF3a/3b*, *ORF6*, *ORF7a/7b*, *ORF8*, and *ORF9b* are known to dysregulate the anti-viral response, creating the immunopathology observed in COVID-19.<sup>30,31</sup> We reasoned that these innate immune changes could play key roles in ADRD onset and/or progression. To investigate this idea, we analyzed gene expression in the brains of deceased CoV-2 patients and uninfected patients (NCBI Gene Expression Omnibus [GEO] database Series GEO: GSE188847) and compared these data with AD brains versus controls (GEO: GSE118553). These analyses identified several “hub” genes that are similarly regulated in both diseases and led us to hypothesize

that CoV-2 can become neurotropic in aged brains causing innate immune activation, neuroinflammation, and neurodegeneration leading to tauopathy and the cognition impairment of AD. To test this, we established CoV-2 infection in a mouse model using a mouse-adapted strain of SARS-CoV-2 (MA10) and examined how susceptibility to this viral infection changes with age. We further examined the association of gradual aging with inflammation, neurodegeneration, and infection-driven expression of ADRD genes/proteins with potential to cause the onset and/or rapid progression of ADRD.

## RESULTS

### Gene expression changes in brains of patients with COVID-19 and AD

We obtained whole-transcriptome expression data from COVID-19 versus control and AD versus control frontal cortex patient samples from the NCBI GEO database. Differential gene analysis generated 2,446 genes significantly up- or downregulated in the brains of COVID-19 patients and 856 genes significantly up- or downregulated in the brains of patients with AD (Figures 1A and 1B). Dimensionality reduction and clustering yielded only moderate separation between disease and control groups, highlighting the impact of patient-to-patient variation in gene expression (Figures S1A and S1B). Sorting the differentially expressed genes into GO pathways revealed several common pathways affected by both diseases, although the absolute gene counts were skewed by the difference in size of each dataset (Figure 1C).

### COVID-19 brains exhibit an AD risk gene expression signature

In order to compile a set of AD risk genes, we searched relevant literature for studies describing the molecular etiology of AD and providing evidence for the specific function of individual genes/proteins in AD onset or progression. We have compiled our findings into five functional categories of inflammation, protein folding/trafficking, complement activation, calcium homeostasis, and amyloid/tau processing (Table 1). We imported this gene list into Ingenuity Pathway Analysis (IPA) and plotted experimentally observed interactions as a network. Fold change values (Figure S2) from the COVID-19 brain dataset were overlaid onto the network, revealing increased inflammatory cytokines *IL-18*, *CXCL8*, and *IL-6* receptor along with the

**Table 1. ADRD risk/pathology genes**

| Gene   | Expression in COVID-19        | Function                                                                | Reference                                                                        |
|--------|-------------------------------|-------------------------------------------------------------------------|----------------------------------------------------------------------------------|
| CCL20  | predicted activation          | recruitment of leukocytes                                               | Goldeck et al. <sup>32</sup>                                                     |
| CTCF   | increased                     | controls gene expression in myeloid cells                               | Corces et al., <sup>33</sup> Novikova et al. <sup>34</sup>                       |
| CXCL8  | increased                     | neuroinflammation                                                       | Zuena et al. <sup>35</sup>                                                       |
| EGFR   | increased                     | astrocyte activation, inflammation                                      | Mansour et al. <sup>36</sup>                                                     |
| GFAP   | increased                     | astroglial activation                                                   | Cicognola et al. <sup>37</sup>                                                   |
| IFI16  | increased                     | interferon-induced DNA sensor                                           | Velez et al. <sup>38</sup>                                                       |
| IL-17  | predicted activation          | neuroinflammation                                                       | Brigas et al. <sup>39</sup>                                                      |
| IL-18  | increased                     | neuroinflammation/amyloid processing                                    | Ojala et al. <sup>40</sup>                                                       |
| IL-6R  | increased                     | neuroinflammation                                                       | Haddick et al. <sup>41</sup>                                                     |
| KLF4   | increased                     | regulates neuronal apoptosis and axon regeneration                      | Cheng et al. <sup>42</sup>                                                       |
| LGALS3 | increased                     | microglia-mediated inflammation, amyloid aggregation                    | Tan et al., <sup>43</sup> Tao et al. <sup>44</sup>                               |
| TAC1   | decreased                     | vasodilator                                                             | Dharshini et al. <sup>45</sup>                                                   |
| CAV1   | increased                     | endocytosis and protein trafficking                                     | Gaudreault et al. <sup>46</sup>                                                  |
| FKBP5  | increased                     | tau phosphorylation, tau oligomerization, glucose metabolism            | Wang et al., <sup>47</sup> Fuji et al., <sup>48</sup> Blair et al. <sup>49</sup> |
| HSP90  | decreased                     | protein folding                                                         | Blair et al. <sup>50</sup>                                                       |
| HSPA8  | decreased                     | autophagy/tau regulation                                                | Loeffler et al. <sup>51</sup>                                                    |
| IFITM3 | increased                     | modulates $\gamma$ -secretase                                           | Hur et al. <sup>52</sup>                                                         |
| C3/4   | increased                     | complement activation, association with plaques                         | Tenner et al. <sup>53</sup>                                                      |
| C5AR1  | increased                     | C5a receptor on myeloid cells                                           | Hernandez et al. <sup>54</sup>                                                   |
| CR1    | predicted activation          | phagocytosis of immune complexes, inflammation                          | Zhu et al. <sup>55</sup>                                                         |
| CALB1  | decreased                     | calcium sequestration                                                   | Sanfillipo et al. <sup>56</sup>                                                  |
| CAMKK2 | decreased                     | regulatory kinase Ca-dependent signaling                                | Sabbir et al., <sup>57</sup> Mairet-Coello et al. <sup>58</sup>                  |
| BDNF   | decreased                     | protects against tau-related neurodegeneration                          | Elliott et al. <sup>59</sup>                                                     |
| CCK/BR | decreased/ predicted decrease | hormone, maintaining memory                                             | Plagman et al. <sup>60</sup>                                                     |
| PLAT   | increased                     | tissue plasminogen activator, cleaves pro-BDNF, cleaves amyloid plaques | Shibata et al. <sup>61</sup>                                                     |

transcription factors *STAT3* and *KLF4* and the marker of neuroinflammation *GFAP*. Although specific cell types responsible for promoting inflammation in these patients is not known, we did observe an increase in gene signatures associated with monocytes, neutrophils, and activated dendritic cells in the COVID-19 brains; however, these changes were not statistically significant (Figure S3). Hub gene analysis using the Search Tool for the Retrieval of Interacting Genes/Proteins (STRING) database of protein interactions reinforced the evidence of neuroinflammation yielding canonical mediators and regulators of inflammation (*CCL2*, *CXCL8*, *NF- $\kappa$ B*, and *STAT3*) as some of the differentially expressed genes with the most interactors in the dataset (Figure S4). Complement activation was also evident from increased *C4a* and *C5AR1*. Decreased expression of HSP chaperones *HSP90AB1*, *HSP90AA1*, and *HSPA8* was observed, while *FKBP5* was increased. Calcium signaling components (*CAMKK2* and calbindin) and the receptor for cholecystokinin, *CCKBR*, were all decreased in expression (Figure 2).

#### SARS-CoV-2 MA10 neurotropism is increased in aged mice

Since age is one of the crucial risk factors for the severity of infection, we investigated the neurological consequences associated with CoV-2 infection in both young and old mice at both acute (4 days post-infection [DPI]) and post-acute (18 DPI) time points. Thus, 3-, 6-, and 20-month-old C57BL/6 mice were infected with  $1 \times 10^5$  of MA-10 intranasally. The infected mice were sacrificed 4 and 18 DPI, and viral titer and gene expression analyses were performed. A plaque assay was performed from the brain samples to quantitate the viral titer (Figures 3A and 3B). No plaques were detected in the infected young mice (3 months), but a significant number of plaques were detected in the infected adult (6 months) and in aged mice (20 months) groups. Also, the plaques were detected at only 18 DPI, and no plaques were detected in 4 DPI brain samples. qPCR analysis of RNA isolated from three brain regions (olfactory bulb, cortex, and hippocampus) confirmed the presence of CoV-2 N-protein transcript (Figure 3C). Samples from 3-month-old mice

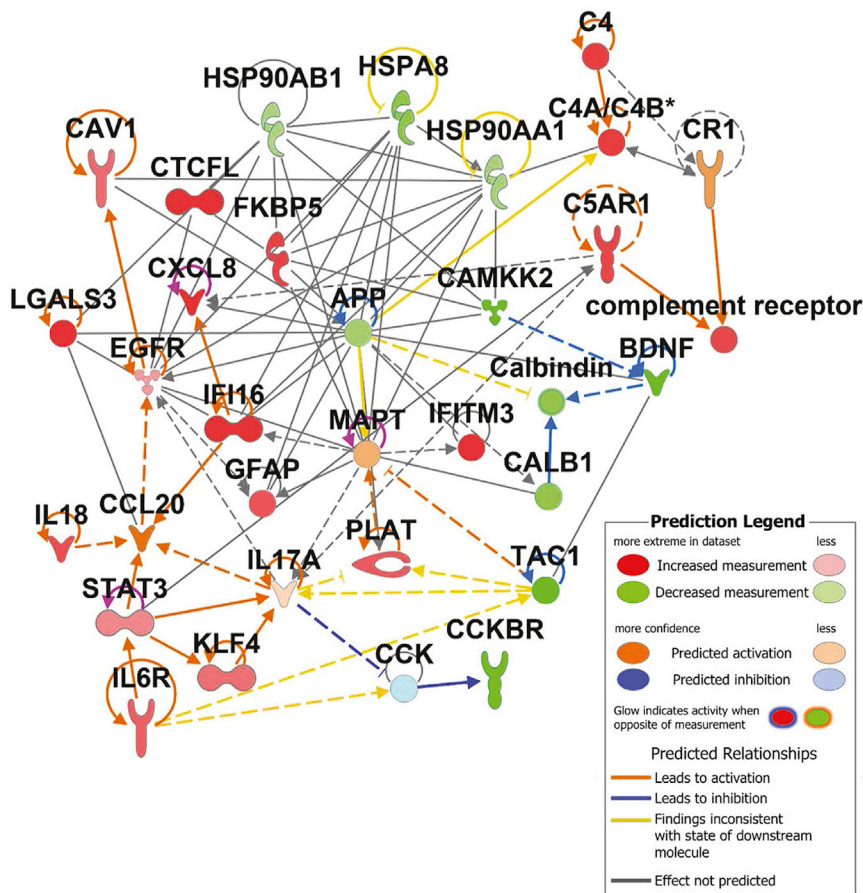

**Figure 2. Severe COVID alters expression of key Alzheimer's risk genes in the human brain**

Network of AD risk genes depicting experimentally observed interactions (IPA database) and fold change of gene expression observed in COVID frontal cortex samples versus control, GEO: GSE188847 (green/red).

### Expression of ADRD risk/pathology genes is increased in aged MA10-infected mice

We next examined the expression of five key AD risk genes identified by the network analysis in Figure 2 (*FKBP5*, *IFITM3*, *IFI16*, *CR1*, and *C5AR1*). *FKBP5* is a polyfunctional chaperone protein known to be associated with cognitive abnormalities and dysregulation of calcium homeostasis in AD.<sup>62</sup> *IFITM3* is induced by the interferon-driven inflammatory response and is known to increase the activity of  $\gamma$ -secretase for A $\beta$  production.<sup>63</sup> Similarly, the interferon-stimulated gene *IFI16* has been identified as a possible driver of neuroinflammation, and synaptic loss, in the AD brain.<sup>64</sup> *IFI16* is an inflammasome component that serves as a viral nucleic acid sensor and promotes production of interleukin-1 $\beta$  (IL-1 $\beta$ ).<sup>65</sup> *CR1* is the receptor for complement factors C3b and C4b, which are known to be hyperactivated in COVID-19.<sup>55</sup> It is expressed on antigen-presenting cells including microglia as well as on neurons. *C5AR1* is a receptor for C5a expressed primarily

on myeloid cells and has been used as a biomarker for AD.<sup>54</sup> None of these genes were found to be upregulated in 3-month-old mice; however, all of them were significantly upregulated in 6- and 20-month-old mice, although *Ifitm3* expression was lower in the hippocampus than in the olfactory bulb and cortex (Figure 4A). An increase in *Fkbp5* protein expression was confirmed in all CoV-2-infected brain regions by immunohistochemistry (Figure 4B). A similar increase in expression of inflammatory and ADRD risk genes was also recapitulated in 17-month-old mice (data not shown).

### Neuroinflammation is increased in old versus young MA10-infected mice

A qPCR analysis showed that the pro-inflammatory cytokines *Il-6*, *Tnf- $\alpha$* , and *Ccl20* were all generally increased in the 6- and 20-month-old infected mice, with the highest expression observed in the 20-month-old mice at 18 DPI (Figure 3D). Only *Il-6* and *Tnf- $\alpha$*  were significantly increased in the 3-month-old mice, and this increase was only observed in the olfactory bulb. The inflammasome component encoding genes *Nlrp3* and *IFI-16* (*Ifi204* mouse homolog) were also significantly upregulated in 6- and 20-month-old mice along with *Il1 $\beta$*  but were unchanged in 3-month-old mice. An increase in active caspase-1 (p20) was observed in all brain regions of the 20-month-old infected mice (Figure S5). Overall, these data indicate that the intensity and pervasiveness of inflammation caused by CoV-2 infection in the brain increased with age and that inflammation may persist long term for at least 18 days.

on myeloid cells and has been used as a biomarker for AD.<sup>54</sup> None of these genes were found to be upregulated in 3-month-old mice; however, all of them were significantly upregulated in 6- and 20-month-old mice, although *Ifitm3* expression was lower in the hippocampus than in the olfactory bulb and cortex (Figure 4A). An increase in *Fkbp5* protein expression was confirmed in all CoV-2-infected brain regions by immunohistochemistry (Figure 4B). A similar increase in expression of inflammatory and ADRD risk genes was also recapitulated in 17-month-old mice (data not shown).

### Inflammation and ADRD gene signature are correlated with tau pathology, $\alpha$ -synuclein, and demyelination

We analyzed pooled CoV-2- or mock-infected mouse cortex samples for the expression of gene transcripts of additional AD risk genes by Nanostring nCounter Glial Profiling panel and Neuroinflammatory panel. These panels include key processes and pathways regulated under diseased conditions, such as cell stress and damage response (134 genes), glial regulation (180 genes), inflammation, and peripheral immune invasion (188 genes). The IPA analysis of Nanostring data (MA10-infected mouse brain samples) also showed a similar signature as that of the data collected from the GEO database (human brain tissue from CoV-2-infected patients). Upregulated genes include *Lgals3*, *Egfr*, *C4a*, *Fkbp5*, *Gfap*, *Mapt*, *Ifitm3*,

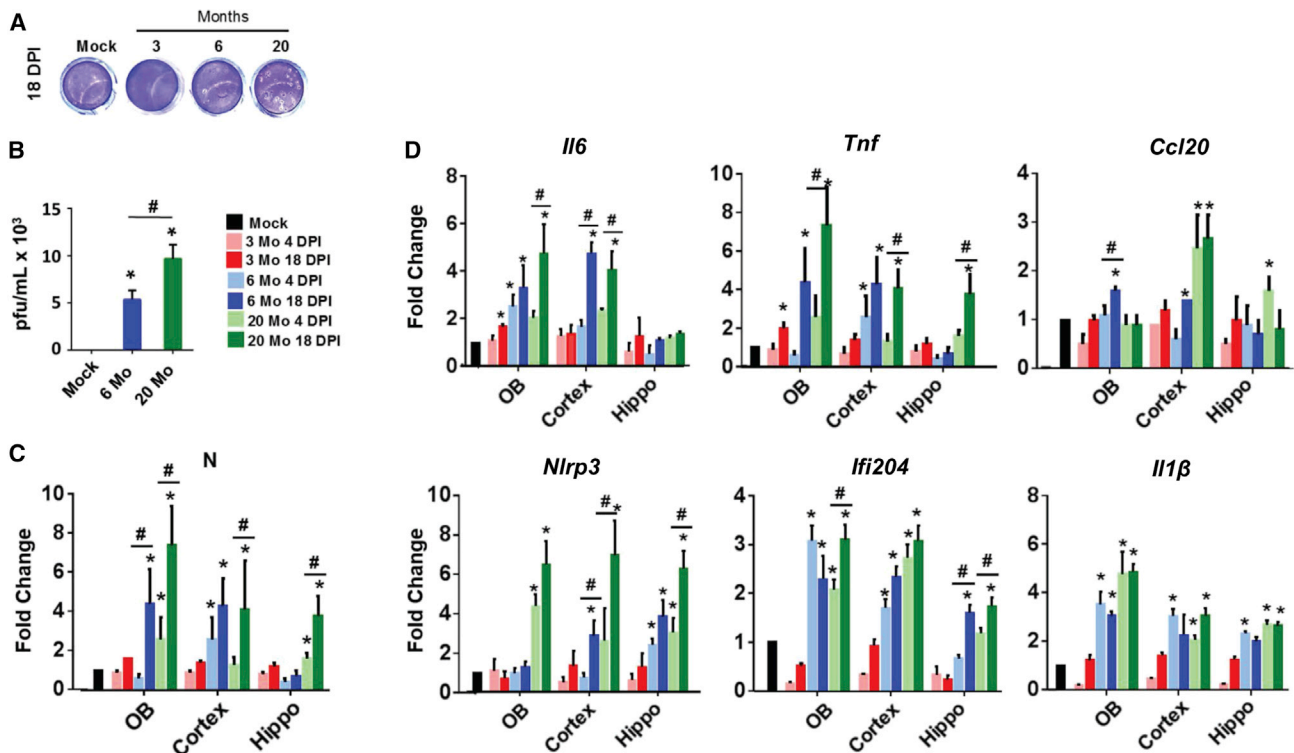

**Figure 3. Infection with SARS-CoV-2 MA10 virus induces neuroinflammation in aged mice**

(A) Representative images of plaque assays performed on homogenized brain tissue collected from MA10-infected 3-, 6-, and 20-month-old mice. (B) Histogram depicting quantification of viral plaque assay to determine the concentration of infectious particles present in brain tissue (PFU/mL). (C) Histogram depicting mRNA fold change of CoV-2 nucleoprotein (N) expression in brains collected from MA10-infected mice compared with mock. (D) Histograms depicting mRNA fold change of proinflammatory genes (*Il6*, *Tnf*, and *Ccl20*), and inflammasome genes (*Nlrp3*, *Ifi204*, *Il1β*), in infected brain.  $n = 3$ ; data expressed as mean  $\pm$  SEM; \* compared with respective mock; # 18 DPI compared with 4 DPI of the same brain region; \*, # $p < 0.05$  by ANOVA with Holm-Sidak test.

*Stat3*, *C5ar1*, and *Il6r*. Downregulated genes include *Hsp90ab1*, *Bdnf*, and *App* (Figure 4C).

Our data and others have suggested that CoV-2 infection may promote aberrant tau accumulation.<sup>66</sup> Hence, we examined the tau pathology in MA10-infected mice by immunohistochemical staining using pT231 tau, an AD-relevant tau phosphorylation.<sup>67</sup> Brains from each group were sectioned and stained at 18 DPI. p-tau-positive cells were not present in the mock-infected mice or in the 3-month-old MA10-infected mice (Figure 5A). However, the number of p-tau-positive cells was significantly elevated in all examined brain regions of the 6- and 20-month-old mice, with significant increases in the olfactory bulb and cortex of the 20-month-old group compared with the 6-month-old group. We also examined the accumulation of tau oligomers, which data support as a toxic form of tau,<sup>68–70</sup> using an oligomeric tau-specific antibody and again found a significant increase in the 6- and 20-month-old MA10-infected groups compared with mock as well as a significant increase in the 20-month-old MA10 group compared with the 6-month-old MA10 group in all brain regions (Figure 5B). Similar increases in oligo-tau and p-tau were also recapitulated in 17-month-old mice (data not shown). Furthermore, p-tau was observed specifically in

brain regions adjacent to CD31+ endothelial cells (Figure 5C), which, in prior studies, was linked with blood-brain barrier dysfunction.<sup>71</sup> Increased von Willebrand factor (vWF) staining in infected brains was observed as evidence of this blood-brain barrier (BBB) damage (Figure S6). In addition, immunohistochemical analysis of CoV-2-infected brain tissue shows elevated GFAP expression (astroglial activation) and IBA1 expression (microglial activation) in the olfactory bulb, cortex, and hippocampus (Figures S7 and S8). A significantly increased grade of demyelination (MBP staining) in the striatum of infected aged brain tissues was observed along with significantly increased  $\alpha$ -synuclein staining in the 6- and 20-month-old infected mice (Figures S9 and S10).

## DISCUSSION

This article provides evidence for two major findings. First, a comparison of gene expression changes in brains of human patients with AD or COVID-19 versus their respective controls along with brain pathological studies in the CoV-2 MA10 aged mouse model has led to identification of several common hub genes and pathways that are similar in pathogenesis of AD in mice and humans. To the best of our knowledge, our analysis is the first of its kind wherein transcript expression in the brain (cortex) has been compared between elderly

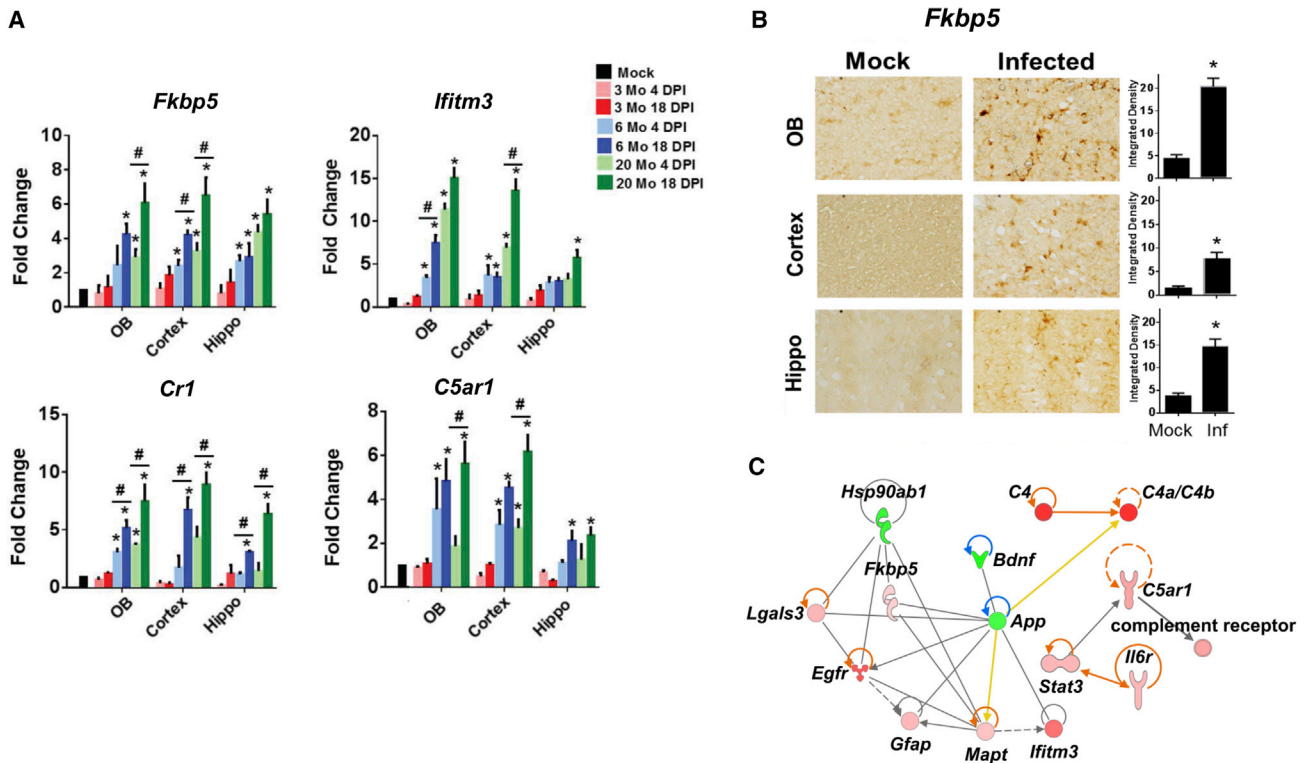

**Figure 4. Infection with SARS-CoV-2 MA10 virus induces ADRD risk genes and complement activation in aged mice**

(A) Histograms depicting mRNA fold change of ADRD risk genes (*Fkbp5*, *Ifitm3*), and complement activation genes (*Cr1*, *C5ar1*), in brains collected from MA10-infected mice. (B) Bright-field images and respective quantification showing FKBP5 expression in the olfactory bulb, cortex, and hippocampus of MA10-infected 20-month-old mice brains at 18 DPI. (C) Ingenuity Pathway Analysis (IPA) network showing genes that are differentially expressed in cortex of infected aged mice (20 months old) 18 DPI as assayed by nCounter neuroinflammatory and glial profiling panel.  $n = 3$ ; data expressed as mean  $\pm$  SEM; \* compared with respective mock; # compared with respective 4 DPI; \* $p < 0.05$  by ANOVA with Holm-Sidak test.

patients with severe COVID-19 and patients with AD. Previously, a solely bioinformatic study compared the AD brain transcript profile (GEO: GSE147507;  $n = 97$ ) with COVID lung gene expression (GEO: GSE132903;  $n = 2$ ).<sup>72</sup> Second, the mouse studies using CoV-2 MA10 virus revealed that CoV-2 neurotropism was dependent upon the age of the mice. Thus, replication of MA10 virus was evident in the brains of aged (6- and 20-month-old) mice but not in young 3-month-old mice. Notably, despite evidence of neurotropism for SARS-CoV and Middle East respiratory syndrome (MERS)-CoV and affirmative CoV-2 neurotropism studies *in vitro* in human cells,<sup>73</sup> *in vivo* neurotropism of CoV-2 has remained unclear due to the lack of virus detection in many post-mortem patient brain and CNS samples. Our establishment of CoV-2-MA10 infection in an aged mouse model has provided the first *in vivo* evidence for CoV-2 neurotropism in wild-type mice. The MA10 aged mouse model has provided a unique opportunity to investigate the connection between viral infection and ADRDs including the mechanistic underpinnings of this relationship. With millions of patients infected by CoV-2 having mild, moderate, and severe infections and 15%–30% of those also suffering from long COVID, potential increased risk of ADRDs would have significant clinical impact.<sup>15</sup>

The major evidence for SARS-CoV-2 neurotropism (N-gene transcript expression and viral plaque assay) definitively demonstrates viral replication in the brain tissue, though the cellular localization of the virus within the mouse brain (endothelial, microglia, neuron, etc.) and the extent of viral replication within these cells remain unknown. Our findings are consistent with the previous epidemiological and laboratory reports of severe viral infections leading to a preponderance of CNS diseases including AD, Parkinson's disease, and encephalopathy.<sup>6–8</sup> Notably, we observed increased vWF expression in aged, infected brains as evidence of vascular damage along with increased p-tau in regions adjacent to the endothelial cell marker CD31, suggesting there may be a vascular etiology to this pathology. This is consistent with primate data that suggested that CoV-2 replication mainly within vascular endothelial cells in the brain.<sup>74</sup> Further, we found that changes in expression of genes in COVID-19 brains included the Wnt signaling pathway. This pathway is dysregulated in AD, with beta catenin (CTNNB1) aggregation linked to proteosomal dysfunction and tau phosphorylation by GSK3 $\beta$ ,<sup>75</sup> thus contributing to AD risk.

In a broad sense, the CoV-2 neuropathology contains many elements overlapping with AD. Neuroinflammation is a major driver of both

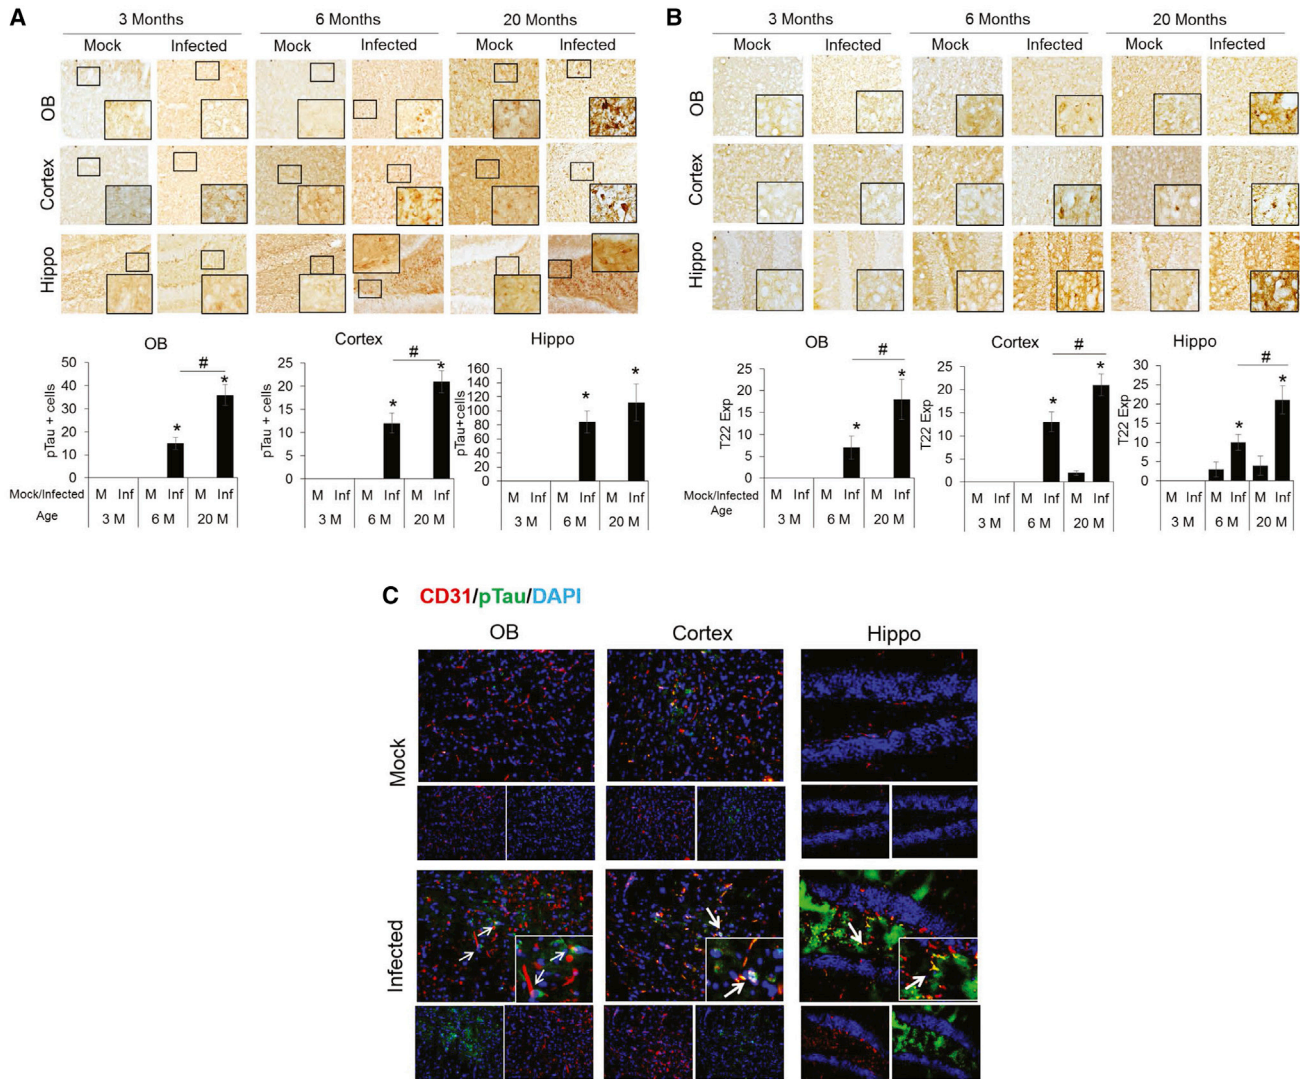

**Figure 5. SARS-CoV-2 MA10 infection induces p-tau expression in olfactory bulb, cortex, and hippocampus of 6- and 20-month-old mice**

(A) Bright-field images showing immunoperoxidase staining of p-tau (pT231) in olfactory bulb (top panel), cortex (middle panel), and hippocampus (bottom panel) of 3-, 6-, and 20-month-old mice at 18 DPI. Histogram showing ImgaeJ quantification of p-tau expressing cells. (B) Bright-field images showing immunoperoxidase staining of tau (T22), oligomeric expression in olfactory bulb (top panel), cortex (middle panel), and hippocampus (bottom panel) of 3-, 6- and 20-month old mice, at 18 DPI. Histogram showing ImgaeJ quantification of tau (T22)-expressing cells. (C) Co-localization of CD31-p-tau expression in olfactory bulb, cortex, and hippocampus. CD31: red, DAPI: blue, and p-tau: green. Arrows indicate areas of p-tau/CD31 co-localization. n = 3; data expressed as mean ± SEM; \* compared with respective mock; # compared between 6- and 20-month-old infected mice, #p < 0.05.

diseases; however, additional pleiotropic signaling pathways are also implicated, including EGFR, Wnt, and immune cell activation. Indeed, we have observed gene expression changes within these pathways in both diseases, albeit with only moderate overlap between individual genes. Increased oxidative stress and dysregulated ribosomal function are known features of both diseases as well. Through pathway analysis of known AD-gene relationships in the IPA and STRING databases and literature review, we have grouped ADRD risk genes into 5 categories: inflammation, protein folding/trafficking, complement activation, calcium homeostasis, and amyloid/tau pro-

cessing (Table 1). Many changes in expression of these risk genes and specific gene mutations have been associated with late-stage AD through sequencing of brain tissue from post-mortem patients. However, due to the complexity of the disease and the inability to collect longitudinal samples, direct causes of AD remain poorly defined. Recently, the once-controversial “infectious hypothesis” of AD has been gaining more attention.<sup>76,77</sup> Although it seems unlikely that an infectious agent such as a prion or virus will emerge as the direct cause of AD, it is possible that the molecular signaling changes brought on by inflammation due to aging and followed by infection

(“double-hit model”) could serve as a trigger for disease progression in individuals who are already genetically predisposed. The data presented herein support this hypothesis.

Consistent with our previous report,<sup>29</sup> the results of our gene expression profiles in CoV-2-infected and AD brains showed similarly increased activation of complement/coagulation signaling and the inflammasome, which are known hallmarks of moderate and severe COVID-19. We have presented evidence of this same activation in both human and mouse brains (*IL-18*, *CCL20*, *NLRP3*, *C4a*, and *C5AR1*) (Figures 2A and 4A–4C). Furthermore, we have shown how increased expression of these genes may activate downstream AD risk genes (*IFI16*, *IFITM3*, *FKBP5*, *GFAP*) ultimately leading to tau and  $\alpha$ -synuclein pathology as observed in the mouse model (Figures 5 and S9). Indeed, some of these genes play dual roles in innate immunity and AD. *IFITM3* is an interferon-stimulated gene that prevents viral entry into cells by disrupting cholesterol synthesis and shuttling viral particles to lysosomes. However, it is also known to have secondary activities including activation of PI3K signaling and activation of  $\gamma$ -secretase to increase A $\beta$  production.  $\alpha$  synuclein-GSK3 $\beta$  activity could exacerbate this AD pathology by promoting a feedback loop of tau phosphorylation, and aggregation of both tau and A $\beta$ , with a simultaneous increase in A $\beta$  production.<sup>78</sup> Presenilin-1 (PSEN1) plays a role in proteolytic cleavage of APP to A $\beta$ , which interacts with  $\alpha$ -synuclein, forming complexes as witnessed in patients with AD with PSEN1 mutations. Altogether, there are a number of *in vitro* and *in vivo* studies supporting the leading role that  $\alpha$ -synuclein plays in several mechanisms and processes linked to AD.<sup>79–81</sup>

Perhaps the most significant connection between CoV-2 infection and AD observed in both human tissue and the mouse model is the potential for CoV-2 infection to promote tau phosphorylation and oligomerization. This phenomenon has been observed at the protein level in the brain tissue of both elderly dementia patients and patients who have died from COVID-19.<sup>66</sup> In this case, a leaky calcium channel driven by virus-induced inflammasome activation and oxidative stress is hypothesized to promote tau pathology through a reduction in calbindin. We observed a similar decrease in calbindin expression in COVID-19 brains along with a decrease in CAMKK2 and evidence of inflammasome activation (increased IL-18, IFI16, and STAT3). In the mouse model, we observed increased Nlrp3, Tnf $\alpha$ , and active cleaved caspase-1 (p20), indicating inflammasome activation, but here we were also able to observe the tau pathology directly, including significant increases in tau phosphorylation and oligomerization. Studies are ongoing to determine the timeline of inflammasome induction in the CoV-2-infected brain and whether this induction is dependent on recognition of viral RNA or host DNA damage.

One limitation of our study is the inability to reliably discern between the causes and effects of AD since patient tissues are collected post-mortem at late-stage AD. These patients typically exhibit an upregulation of protein synthesis in response to the high degree of protein misfolding and aggregation characteristic of AD. Therefore, the upregulation

of protein synthesis in viral infection to mediate production of viral particles may be a coincidence rather than a promotor of AD development. Another limitation of our study is that despite the similarities we observed at the pathway level in brains of patients with COVID-19 versus AD, as expected there were dissimilarities at the level of individual gene expression. The latter was expected primarily due to the two following reasons. First, the COVID-19 group had a severe active viral infection at the time of sample collection, the AD group did not. Second, the AD brains were collected from patients with late-stage AD pathology, while the COVID-19 patients were beginning to express molecular markers of AD but were not diagnosed with AD. Lastly, our studies do not address whether gene expression changes in SARS-CoV-2-infected brains can cause AD-related changes in cognition; this is due to the fact that our study focused on acute SARS-CoV-2 infection following a single inoculation event and was not followed up beyond 18 DPI. This is beyond the scope of our present study, and it remains to be elucidated in future studies. Furthermore, respiratory viruses other than SARS-CoV-2 such as influenza and respiratory syncytial virus have also been known to present with CNS complications. Future studies will be needed to compare their infections in the aged mouse model to determine whether the ADRD pathology we observed is specific to SARS-CoV-2, although some changes to the model may be required to accommodate the differing mechanisms/pathologies of infection by these viruses in mice.

Overall, we have shown that CoV-2 infection induces gene expression changes in multiple pathways linked to AD susceptibility including inflammation, protein chaperones, amyloid processing, ubiquitin mediated protein degradation, FKBP5 in tau processing, endoplasmic reticulum (ER) protein transport, and calcium homeostasis. While the complexity of AD pathology does not lend itself to discovery of a single definitive link suggesting CoV-2 as a causative agent of AD, the significant overlap in the gene expression profiles of the two diseases across multiple functional pathways in combination with the ADRD pathology observed in the brains of aged, infected mice warrants further mechanistic studies.

## MATERIALS AND METHODS

### Differential gene expression analysis

Gene expression data from severe COVID-19 (n = 12) or COVID-19-unaffected (n = 12) individuals were obtained from the NCBI GEO database (GEO: GSE188847). In the associated study, frontal cortex tissues were collected within a post-mortem interval of less than 48-h. Unaffected patients were selected to be age and sex matched with COVID-19 patients. Salmon transcript quantification files for each patient were retrieved from GEO. A transcript to gene map file was exported from Ensembl Bio-Mart using GRCh38.p13. Pooled differential gene analysis (12 COVID-19 versus 12 control samples) was performed using DESeq 2. The fold change output for each gene was filtered to only include significant changes (p  $\leq$  0.05). Gene expression data from frontal cortex samples from patients with AD (n = 40) and normal controls (n = 22) were obtained from the GEO database (GEO: GSE118553). The GEO2R web tool



(NCBI) was used to compare gene expression between AD and control groups, generating a list of differentially expressed genes with fold change and adjusted<sup>82</sup> p value.

### Protein-protein network and hub gene analysis

The lists of significantly differentially expressed genes in AD and COVID-19 were uploaded into the STRING database, and networks of gene interactions were obtained. Local network clusters matching genes upregulated in COVID-19 were ranked for their fit to the STRING database according to enrichment score. This entire network was imported into Cytoscape for hub gene analysis using the Cytohubba tool. The top 20 genes in 4 ranked algorithms; maximal clique centrality (MCC), density of maximum neighborhood component (DMNC), maximum neighborhood component (MNC), and Degree were identified, and the intersections between the four algorithms where two or more algorithms agreed were considered as the hub genes. This analysis was repeated for the AD versus control dataset. AD-related gene clusters were determined by taking the list of genes from the AD “disease” category in the IPA database (1,016 genes) and importing them into STRING as a network. Markov cluster algorithm (MCL) clustering was performed on the network with an inflation parameter of 2, and the top 8 clusters were selected for analysis.

### IPA

Alzheimer’s genes were selected from literature (see Table 1). IPA (Qiagen) was used to plot known connections between the genes creating a molecular network. RNA sequencing (RNA-seq) profiling of human frontal cortex in severe COVID-19 (n = 12) or unaffected (n = 12) patients was obtained from the NCBI GEO database (GEO: GSE188847). Pooled differential gene analysis of COVID-19 versus unaffected patients was performed using DESeq2. Significantly differentially expressed genes (p < 0.05) were uploaded into IPA, and their fold change information was overlaid onto the Alzheimer’s gene network.

The IPA (Qiagen) database was queried for all genes known to contribute to or be altered in AD. The sub-set of these genes differentially expressed in COVID-19 were selected. Significantly differentially expressed genes (p < 0.05) were uploaded into STRING, and the STRING database of protein-protein interactions was used to generate an interaction network. This network was imported into Cytoscape, and hub genes were identified within the network using Cytohubba. The IPA database was queried for genes known to increase susceptibility for Alzheimer’s and to play a role in the early development of Alzheimer’s. These Alzheimer’s genes were connected to the hub genes using known relationships in the IPA database.

### SARS-CoV-2 MA10 virus stock preparation and titration with plaque-based assays

All experiments utilizing replication-competent SARS-CoV-2 were performed in a biosafety level 3 (BSL-3) laboratory at the University of South Florida. All viral stocks were produced and isolated from supernatants of Vero-E6 cells expressing human ACE2 and TMPRSS2

(BEI Resources NR-54970), cultured in T175 flasks to a confluency of 80%–90%, and infected with an original passage 2 (P2) MA10, at an MOI of 0.05 for 4 h, in 8 mL serum-free OptiMEM. Media was then replaced with 20 mL DMEM media supplemented with 5% FBS and 1% penicillin-streptomycin antibiotic and incubated for 72 h until clear cytopathic effect (CPE) was present. MA10 was obtained from BEI Resources (BEI Resources NR-55329). Supernatants were harvested, cleared of cell debris by centrifugation (500 × g, 10 min) and filtration (0.45 μm), mixed with 10% SPG buffer (ATCC #MD9692), aliquoted, and stored at –80°C. Viral titers were quantified by determining the number of individual plaque-forming units (PFUs) after 72 h of infection on confluent Vero-E6 ACE2 TMPRSS2 cells. In brief, 25 μL viral stock was added to 225 μL OptiMEM (a10<sup>-1</sup> dilution) and was subsequently serially diluted (10-fold) in serum-free medium and inoculated on 7.5 × 10<sup>5</sup> Vero E6 ACE2 TMPRSS2 cells in triplicates in a 48-well plate for 3 h. The inoculum was then removed and replaced with 0.8% carboxymethylcellulose in OptiMEM +2%FBS+1% penicillin-streptomycin antibiotic as overlay media for 72 h. The plates were then fixed with 80% methanol in water overnight, rinsed with 1× PBS, and stained with 0.1% crystal violet solution in ethanol. Plaques were then counted and calculated as PFU/mL.

### Animal experiments

All animal procedures were conducted in accordance with the NIH guidelines for the Care and Use of Laboratory Animals and approved by the Institutional Animal Care and Use Committee of the University of South Florida. 3-, 6- and, 20-month-old male C57BL/6J mice were housed in a BSL-3 animal facility on a 12 h light-12 h dark cycle with food and water available *ad libitum*. Mice of each age group were infected with 100,000 PFUs of MA10 or mock ultraviolet light-inactivated MA10 that was generated and titrated using the previously described method. Mice under deep isoflurane anesthesia were intranasally inoculated with 50 μL (25 μL per nostril) of virus diluted in OptiMEM media. Mice were observed after inoculation for regain of consciousness and lucidity. Each subsequent day proceeding viral inoculation, the mice were individually examined for signs of infection including body weight change and alterations in body temperature, respiration, and lethargy. Mice were sacrificed 4 and 18 DPI. The brains and lungs were harvested and processed for plaque assay, RNA isolation, and immunostaining. Brain and lung tissue from mice were longitudinally sectioned in half, with half of one lung or brain sample going for RNA processing and the other half for plaque assay, while the second, intact lung was fixed with formalin for sectioning.

### Plaque assay from organ samples

Half of a longitudinally section organ (~214 mg brain tissue or ~50 mg lung) was homogenized in 200 μL OptiMEM media containing 10% penicillin-streptomycin-ampotericin antibiotic. The homogenate was then cleared of cell debris by centrifugation (500 × g, 10 min). Viral titers from infected organs were quantified by determining the number of individual PFUs after 72 h of infection on confluent Vero-E6 ACE2 TMPRSS2 cells. 25 μL supernatant

from the organ homogenate was added to 225  $\mu\text{L}$  OptiMEM ( $10^{-1}$  dilution) and then serially diluted (10-fold) in serum-free medium and inoculated on  $7.5 \times 10^5$  Vero E6 ACE2 TMPRSS2 cells in triplicates in a 48-well plate for 3 h. The inoculum was then removed and replaced with 0.8% carboxymethylcellulose in OptiMEM +2%FBS+1% penicillin-streptomycin antibiotic as overlay media for 72 h. The plates were then fixed with 80% methanol overnight, rinsed with  $1 \times$  PBS, and stained with 0.1% crystal violet solution in ethanol. Plaques were then counted and calculated as PFU/mL of homogenate.

### RNA isolation and PCR

Total RNA was isolated using Trizol (Life Technologies). The extracted RNA was subjected to nCounter gene expression analysis (NanoString Technologies) according to the manufacturer's instructions. Also, RNA was treated with DNase I (Invitrogen, cat. no. 18068) to remove the residual genomic DNA. 1  $\mu\text{g}$  RNA was used to prepare cDNA using Maxima Enzyme  $5 \times$  reaction mix (Thermo Fisher Scientific). Quantitative real-time PCR reaction was performed using the cDNA in CFX384 Touch<sup>TM</sup> Real-Time PCR detection system (Bio-Rad). The reaction mixture was set up to 5  $\mu\text{L}$  containing 1  $\mu\text{L}$   $5 \times$  qPCR master mix, 0.5  $\mu\text{L}$  forward primer and reverse primer (see Table S11), 1  $\mu\text{L}$  water, and 1  $\mu\text{L}$  cDNA. The reaction was performed using the following program: 95°C for 3 min, followed by 45 cycles of 95°C for 10 s, 60°C for 1 min, and 72°C for 15 s. All experiments were run in triplicate for three individual experiments. Gene expression from each age group was normalized to its respective mock control.

### Immunofluorescence staining

Slide-mounted 30  $\mu\text{m}$  brain sections were heated with antigen retrieval solution (1:100; Vector Laboratories, Burlingame, CA, USA) for 45 min at 90°C, cooled, and washed with PBS. The sections were permeabilized, and non-specific antigens were blocked for 1 h with serum-blocking solution (10% host serum, 0.2% Triton in PBS). Next, sections were incubated with primary antibody solution (5% host serum, 0.1% Triton X-100 in PBS; see Table S12) overnight at 4°C. After washing with PBS, sections were incubated with fluorescent tagged secondary antibody, washed again, dried, and mounted with DAPI containing anti-fade mounting medium.

### Immunoperoxidase staining

For immunoperoxidase staining, after heat antigen retrieval, sections were treated with 3% hydrogen peroxide in water for 20 min, incubated with serum-blocking solution, and incubated overnight at 4°C with primary antibody (see Table S12). Following washing, sections were then sequentially incubated with biotinylated secondary antibody for 2 h at room temperature, avidin-biotin peroxidase (ABC, 1:100 Vector Laboratories) for 1 h at room temperature, and 3,3'-Diaminobenzidine (DAB) substrate solution (Vector Laboratories) for 5 min. Sections were washed, dried, and cover slipped with DPX mounting medium. Bright-field or fluorescence images were taken with an Olympus X71 microscope using appropriate filters.

### Image analysis and quantitation

All quantitation was performed using NIH ImageJ Software. For immunohistochemical analysis, images were acquired using an Olympus IX71 microscope controlled by DP70 manager software (Olympus America, Melville, NY, USA). The images were taken at the same exposure and digital gain settings for a given magnification to minimize the differential background. Three sagittal brain sections were stained with each antibody and 3 images ( $20 \times$ ) per region per section were captured, and analysis was performed. The images were converted to grayscale before quantification. The grayscale images were adjusted to exclude noise pixels. The same settings were used for quantifying all images. Positive cells were counted for p-tau, T22 oligomeric tau, IBA1, and  $\alpha$ -synuclein staining using ImageJ software. Similarly, integrated density/unit area (immunoreactivity) was measured for FKBP5, MBP, and GFAP staining using ImageJ software. The results were expressed as mean number of positive cells or mean area of immunoreactivity  $\pm$  standard error of mean (SEM).

### Statistical analysis

All data are presented as mean  $\pm$  SEM. Statistical significance was evaluated by ANOVA with Holm-Sidak test for multiple comparisons if not mentioned otherwise. A p value of less than 0.05 was considered statistically significant for all comparisons.

### Data availability

All whole-transcriptome gene expression datasets analyzed during the current study are available in the NCBI Gene Expression Omnibus repository (<https://www.ncbi.nlm.nih.gov/geo/>) under the accession numbers GEO: GSE188847 and GSE118553. All other data generated or analyzed during this study are included in this published article (and its [supplemental information](#)).

### SUPPLEMENTAL INFORMATION

Supplemental information can be found online at <https://doi.org/10.1016/j.omtm.2022.09.007>.

### ACKNOWLEDGMENTS

This work is supported by the Research Career Scientist (RCS) awards IK6BX004214 to P.C.B., IK6BX004212 to S.M., and to S.S.M.; Veterans Affairs Merit Review grants BX004626 to L.J.B. and BX005490A and BX005757 to S.M. and S.S.M.; Public Service grants R01 CA180758 to B.C. and NS073899 to L.J.B.; FDOH- James & Esther King Biomedical Research Program grant 22K09 to S.M.; and USF-PRRN funding to S.M. and S.S.M. The views expressed in this article are those of the authors and do not necessarily reflect the position or policy of the Department of Veterans Affairs, the United States government, or the National Institutes of Health. All animal studies were conducted at the University of South Florida, and all study protocols were reviewed and approved by the USF Institutional Animal Care and Use Committee (IACUC). All experiments were performed in accordance with IACUC-approved guidelines and regulations. All experiments using replication competent SARS-CoV-2 were performed in the USF BSL-3/ABSL-3 (GHIDR) facility.

## AUTHOR CONTRIBUTIONS

R.G. processed and analyzed transcriptomic data, contributed to analysis of data, prepared figures, and was a major contributor in writing the manuscript. K.M. performed mouse studies, prepared figures, and contributed to writing of the manuscript. A.R.M. contributed to virus production and purification and to writing and editing the manuscript. T.M. contributed to analysis and interpretation of data and editing the manuscript. B.C. contributed to analysis and interpretation of results and editing the manuscript. L.J.B. contributed to analysis and interpretation of results and editing the manuscript. P.C.B. contributed to analysis and interpretation of results and editing the manuscript. S.S.M. contributed to experiment design, analysis and interpretation of data, and writing the manuscript. S.M. contributed to experiment design, analysis and interpretation of data, and writing the manuscript. All authors read and approved the final manuscript.

## DECLARATION OF INTERESTS

The authors have no competing interests to declare.

## REFERENCES

- Thies, W., and Bleiler, L.; Alzheimer's Association (2013). 2013 Alzheimer's disease facts and figures. *Alzheimers Dement* 9, 208–245.
- Knopman, D.S., Amieva, H., Petersen, R.C., Chételat, G., Holtzman, D.M., Hyman, B.T., Nixon, R.A., and Jones, D.T. (2021). Alzheimer disease. *Nat. Rev. Dis. Primers* 7, 33.
- Nelson, P.T., Alafuzoff, I., Bigio, E.H., Bouras, C., Braak, H., Cairns, N.J., Castellani, R.J., Crain, B.J., Davies, P., Del Tredici, K., et al. (2012). Correlation of Alzheimer disease neuropathologic changes with cognitive status: a review of the literature. *J. Neuropathol. Exp. Neurol.* 71, 362–381.
- Bejanin, A., Schonhaut, D.R., La Joie, R., Kramer, J.H., Baker, S.L., Sosa, N., Ayakta, N., Cantwell, A., Janabi, M., Lauriola, M., et al. (2017). Tau pathology and neurodegeneration contribute to cognitive impairment in Alzheimer's disease. *Brain* 140, 3286–3300.
- Xia, C., Makarets, S.J., Caso, C., McGinnis, S., Gomperts, S.N., Sepulcre, J., Gomez-Isla, T., Hyman, B.T., Schultz, A., Vasdev, N., et al. (2017). Association of in vivo [18F]AV-1451 tau PET imaging results with cortical atrophy and symptoms in typical and atypical Alzheimer disease. *JAMA Neurol.* 74, 427–436.
- Wainberg, M., Luquez, T., Koelle, D.M., Readhead, B., Johnston, C., Darvas, M., and Funk, C.C. (2021). The viral hypothesis: how herpesviruses may contribute to Alzheimer's disease. *Mol. Psychiatr.* 26, 5476–5480.
- Sulzer, D., Antonini, A., Leta, V., Nordvig, A., Smeyne, R.J., Goldman, J.E., Al-Dalahmah, O., Zecca, L., Sette, A., Bubacco, L., et al. (2020). COVID-19 and possible links with Parkinson's disease and parkinsonism: from bench to bedside. *NPJ Parkinsons Dis.* 6, 18.
- Tsai, J.P., and Baker, A.J. (2013). Influenza-associated neurological complications. *Neurocrit. Care* 18, 118–130.
- Li, H., Liu, C.C., Zheng, H., and Huang, T.Y. (2018). Amyloid, tau, pathogen infection and antimicrobial protection in Alzheimer's disease -conformist, nonconformist, and realistic prospects for AD pathogenesis. *Transl. Neurodegener.* 7, 34.
- Sy, M., Kitazawa, M., Medeiros, R., Whitman, L., Cheng, D., Lane, T.E., and Laferla, F.M. (2011). Inflammation induced by infection potentiates tau pathological features in transgenic mice. *Am. J. Pathol.* 178, 2811–2822.
- Lee, D.C., Rizer, J., Selenica, M.L.B., Reid, P., Kraft, C., Johnson, A., Blair, L., Gordon, M.N., Dickey, C.A., and Morgan, D. (2010). LPS- induced inflammation exacerbates phospho-tau pathology in rTg4510 mice. *J. Neuroinflammation* 7, 56.
- Ising, C., Venegas, C., Zhang, S., Scheiblich, H., Schmidt, S.V., Vieira-Saecker, A., Schwartz, S., Albaset, S., McManus, R.M., Tejera, D., et al. (2019). NLRP3 inflammatory activation drives tau pathology. *Nature* 575, 669–673.
- Morales, I., Jiménez, J.M., Mancilla, M., and Maccioni, R.B. (2013). Tau oligomers and fibrils induce activation of microglial cells. *J. Alzheimers Dis.* 37, 849–856.
- World Health Organization (2020). WHO COVID-19 dashboard. <https://covid19.who.int/>. (Accessed July 2022).
- Malkova, A., Kudryavtsev, I., Starshinova, A., Kudlay, D., Zinchenko, Y., Glushkova, A., Yablonskiy, P., and Shoenfeld, Y. (2021). Post COVID-19 syndrome in patients with asymptomatic/mild form. *Pathogens* 10, 1408.
- Jiang, R.D., Liu, M.Q., Chen, Y., Shan, C., Zhou, Y.W., Shen, X.R., Li, Q., Zhang, L., Zhu, Y., Si, H.R., et al. (2020). Pathogenesis of SARS-CoV-2 in transgenic mice expressing human Angiotensin-converting Enzyme 2. *Cell* 182, 50–58.e8.
- Mao, L., Jin, H., Wang, M., Hu, Y., Chen, S., He, Q., Chang, J., Hong, C., Zhou, Y., Wang, D., et al. (2020). Neurologic manifestations of hospitalized patients with Coronavirus disease 2019 in Wuhan, China. *JAMA Neurol.* 77, 683–690.
- Mao, L., Wang, M., Chen, S., He, Q., Chang, J., Hong, C., Zhou, Y., Wang, D., Li, Y., Jin, H., and Hu, B. (2020). Neurological manifestations of hospitalized patients with COVID-19 in Wuhan, China: a retrospective case series study. Preprint at medRxiv. <https://doi.org/10.1101/2020.02.22.20026500>.
- Ye, M., Ren, Y., and Lv, T. (2020). Encephalitis as a clinical manifestation of COVID-19. *Brain Behav. Immun.* 88, 945–946.
- Kim, G.U., Kim, M.J., Ra, S.H., Lee, J., Bae, S., Jung, J., and Kim, S.H. (2020). Clinical characteristics of asymptomatic and symptomatic patients with mild COVID-19. *Clin. Microbiol. Infect.* 26, 948.e1–948.e3.
- Beyrouiti, R., Adams, M.E., Benjamin, L., Cohen, H., Farmer, S.F., Goh, Y.Y., Humphries, F., Jäger, H.R., Losseff, N.A., Perry, R.J., et al. (2020). Characteristics of ischaemic stroke associated with COVID-19. *J. Neurol. Neurosurg. Psychiatry* 91, 889–891.
- Benussi, A., Pilotto, A., Premi, E., Libri, I., Giunta, M., Agosti, C., Alberici, A., Baldelli, E., Benini, M., Bonacina, S., et al. (2020). Clinical characteristics and outcomes of inpatients with neurologic disease and COVID-19 in Brescia, Lombardy, Italy. *Neurology* 95, e910–e920.
- Poyiadji, N., Shahin, G., Noujaim, D., Stone, M., Patel, S., and Griffith, B. (2020). COVID-19-associated acute hemorrhagic necrotizing encephalopathy: CT and MRI features. *Radiology* 296, 201187.
- Tape, C., Byrd, K.M., Aung, S., Lonks, J.R., Flanigan, T.P., and Rybak, N.R. (2020). COVID-19 in a patient presenting with syncope and a normal chest X-ray. *R. I. Med. J.* 103, 50–51.
- Poyiadji, N., Shahin, G., Noujaim, D., Stone, M., Patel, S., and Griffith, B. (2020). COVID-19-associated acute hemorrhagic necrotizing encephalopathy: imaging features. *Radiology* 296, E119–E120.
- von Weyhern, C.H., Kaufmann, I., Neff, F., and Kremer, M. (2020). Early evidence of pronounced brain involvement in fatal COVID-19 outcomes. *Lancet* 395, e109.
- Douaud, G., Lee, S., Alfaro-Almagro, F., Arthofer, C., Wang, C., McCarthy, P., Lange, F., Andersson, J.L.R., Griffanti, L., Duff, E., et al. (2022). SARS-CoV-2 is associated with changes in brain structure in UK Biobank. *Nature* 604, 697–707.
- Qin, Y., Wu, J., Chen, T., Li, J., Zhang, G., Wu, D., Zhou, Y., Zheng, N., Cai, A., Ning, Q., et al. (2021). Long-term microstructure and cerebral blood flow changes in patients recovered from COVID-19 without neurological manifestations. *J. Clin. Invest.* 131, 147329.
- Howell, M.C., Green, R., McGill, A.R., Kahlil, R.M., Dutta, R., Mohapatra, S.S., and Mohapatra, S. (2021). Activation of intracellular complement in lungs of patients with severe COVID-19 disease decreases T-cell activity in the lungs. *Front. Immunol.* 12, 700705.
- McGill, A.R., Kahlil, R., Dutta, R., Green, R., Howell, M., Mohapatra, S., and Mohapatra, S.S. (2021). SARS-CoV-2 immuno-pathogenesis and potential for diverse vaccines and therapies: opportunities and challenges. *Infect. Dis. Rep.* 13, 102–125.
- Xu, D., Biswal, M., Neal, A., and Hai, R. (2021). Review Devil's tools: SARS-CoV-2 antagonists against innate immunity. *Curr. Res. Virol. Sci.* 2, 100013.
- Goldeck, D., Larbi, A., Pellicanó, M., Alam, I., Zerr, I., Schmidt, C., Fulop, T., and Pawelec, G. (2013). Enhanced chemokine receptor expression on leukocytes of patients with Alzheimer's disease. *PLoS One* 8, e66664.
- Corces, M.R., Shcherbina, A., Kundu, S., Gludemans, M.J., Frésard, L., Granja, J.M., Louie, B.H., Eulalio, T., Shams, S., Bagdatli, S.T., et al. (2020). Single-cell epigenomic

- analyses implicate candidate causal variants at inherited risk loci for Alzheimer's and Parkinson's diseases. *Nat. Genet.* 52, 1158–1168.
34. Novikova, G., Kapoor, M., Tcw, J., Abud, E.M., Efthymiou, A.G., Chen, S.X., Cheng, H., Fullard, J.F., Bendl, J., Liu, Y., et al. (2021). Integration of Alzheimer's disease genetics and myeloid genomics identifies disease risk regulatory elements and genes. *Nat. Commun.* 12, 1610.
  35. Zuena, A.R., Casolini, P., Lattanzi, R., and Maftai, D. (2019). Chemokines in Alzheimer's disease: new insights into prokineticins, chemokine-like proteins. *Front. Pharmacol.* 10, 622.
  36. Mansour, H.M., Fawzy, H.M., El-Khatib, A.S., and Khattab, M.M. (2022). Repurposed anti-cancer epidermal growth factor receptor inhibitors: mechanisms of neuroprotective effects in Alzheimer's disease. *Neural Regen. Res.* 17, 1913–1918.
  37. Cicognola, C., Janelidze, S., Hertze, J., Zetterberg, H., Blennow, K., Mattsson-Carlgen, N., and Hansson, O. (2021). Plasma glial fibrillary acidic protein detects Alzheimer pathology and predicts future conversion to Alzheimer dementia in patients with mild cognitive impairment. *Alzheimer's Res. Ther.* 13, 68.
  38. Vélez, J.I., Lopera, F., Sepulveda-Falla, D., Patel, H.R., Johar, A.S., Chuah, A., Tobón, C., Rivera, D., Villegas, A., Cai, Y., et al. (2016). APOE\*E2 allele delays age of onset in PSEN1 E280A Alzheimer's disease. *Mol. Psychiatr.* 21, 916–924.
  39. Brigas, H.C., Ribeiro, M., Coelho, J.E., Gomes, R., Gomez-Murcia, V., Carvalho, K., Faivre, E., Costa-Pereira, S., Darrigues, J., de Almeida, A.A., et al. (2021). IL-17 triggers the onset of cognitive and synaptic deficits in early stages of Alzheimer's disease. *Cell Rep.* 36, 109574.
  40. Ojala, J.O., and Sutinen, E.M. (2017). The role of interleukin-18, oxidative stress and metabolic syndrome in Alzheimer's disease. *J. Clin. Med.* 6, E55.
  41. Haddick, P.C.G., Larson, J.L., Rathore, N., Bhargale, T.R., Phung, Q.T., Srinivasan, K., Hansen, D.V., Lill, J.R.; Alzheimer's Disease Genetic Consortium ADGC Alzheimer's Disease Neuroimaging Initiative ADNI, and Pericak-Vance, M.A., et al. (2017). A common variant of IL-6R is associated with elevated IL-6 pathway activity in Alzheimer's disease brains. *J. Alzheimer's Dis.* 56, 1037–1054.
  42. Cheng, Z., Zou, X., Jin, Y., Gao, S., Lv, J., Li, B., and Cui, R. (2018). The role of KLF4 in Alzheimer's disease. *Front. Cell. Neurosci.* 12, 325.
  43. Tan, Y., Zheng, Y., Xu, D., Sun, Z., Yang, H., and Yin, Q. (2021). Galectin-3: a key player in microglia-mediated neuroinflammation and Alzheimer's disease. *Cell Biosci.* 11, 78.
  44. Tao, C.C., Cheng, K.M., Ma, Y.L., Hsu, W.L., Chen, Y.C., Fuh, J.L., Lee, W.J., Chao, C.C., and Lee, E.H.Y. (2020). Galectin-3 promotes Abeta oligomerization and Abeta toxicity in a mouse model of Alzheimer's disease. *Cell Death Differ.* 27, 192–209.
  45. Dharshini, S.A.P., Taguchi, Y.H., and Gromiha, M.M. (2019). Investigating the energy crisis in Alzheimer disease using transcriptome study. *Sci. Rep.* 9, 18509.
  46. Gaudreault, S.B., Dea, D., and Poirier, J. (2004). Increased caveolin-1 expression in Alzheimer's disease brain. *Neurobiol. Aging* 25, 753–759.
  47. Wang, L., Pavlov, P.F., Kumar, R., and Winblad, B. (2020). FKBP51-Hsp90 complex as a novel therapeutic target for Alzheimer's disease. *Alzheimers Dement.* 16.
  48. Fujii, T., Ota, M., Hori, H., Hattori, K., Teraishi, T., Matsuo, J., Kinoshita, Y., Ishida, I., Nagashima, A., and Kunugi, H. (2014). The common functional FKBP5 variant rs1360780 is associated with altered cognitive function in aged individuals. *Sci. Rep.* 4, 6696.
  49. Blair, L.J., Nordhues, B.A., Hill, S.E., Scaglione, K.M., O'Leary, J.C., 3rd, Fontaine, S.N., Breydo, L., Zhang, B., Li, P., Wang, L., et al. (2013). Accelerated neurodegeneration through chaperone-mediated oligomerization of tau. *J. Clin. Invest.* 123, 4158–4169.
  50. Blair, L.J., Sabbagh, J.J., and Dickey, C.A. (2014). Targeting Hsp90 and its co-chaperones to treat Alzheimer's disease. *Expert Opin. Ther. Targets* 18, 1219–1232.
  51. Loeffler, D.A., Klaver, A.C., Coffey, M.P., Aasly, J.O., and LeWitt, P.A. (2016). Age-related decrease in heat shock 70-kDa protein 8 in cerebrospinal fluid is associated with increased oxidative stress. *Front. Aging Neurosci.* 8, 178.
  52. Hur, J.Y. (2021). Innate immunity protein IFITM3 in Alzheimer's disease. *DNA Cell Biol.* 40, 1351–1355.
  53. Tenner, A.J. (2020). Complement-mediated events in Alzheimer's disease: mechanisms and potential therapeutic targets. *J. Immunol.* 204, 306–315.
  54. Hernandez, M.X., Jiang, S., Cole, T.A., Chu, S.H., Fonseca, M.I., Fang, M.J., Hohsfield, L.A., Torres, M.D., Green, K.N., Wetzel, R.A., et al. (2017). Prevention of C5aR1 signaling delays microglial inflammatory polarization, favors clearance pathways and suppresses cognitive loss. *Mol. Neurodegener.* 12, 66.
  55. Zhu, X.C., Yu, J.T., Jiang, T., Wang, P., Cao, L., and Tan, L. (2015). CR1 in Alzheimer's disease. *Mol. Neurobiol.* 51, 753–765.
  56. Sanfilippo, C., Castrogiovanni, P., Imbesi, R., and Di Rosa, M. (2020). CHI3L2 expression levels are correlated with AIF1, PECAM1, and CALB1 in the brains of Alzheimer's disease patients. *J. Mol. Neurosci.* 1598–1610.
  57. Sabbir, M.G. (2018). Loss of Ca(2+)/calmodulin dependent protein kinase kinase 2 leads to aberrant transferrin phosphorylation and trafficking: a potential biomarker for Alzheimer's disease. *Front. Mol. Biosci.* 5, 99.
  58. Mairet-Coello, G., Courchet, J., Pieraut, S., Courchet, V., Maximov, A., and Polleux, F. (2013). The CAMKK2-AMPK kinase pathway mediates the synaptotoxic effects of Abeta oligomers through Tau phosphorylation. *Neuron* 78, 94–108.
  59. Elliott, E., Atlas, R., Lange, A., and Ginzburg, I. (2005). Brain-derived neurotrophic factor induces a rapid dephosphorylation of tau protein through a PI-3 Kinase signaling mechanism. *Eur. J. Neurosci.* 22, 1081–1089.
  60. Plagman, A., Hoscheidt, S., McLimans, K.E., Klinedinst, B., Pappas, C., Anantharam, V., Kanthasamy, A., and Willette, A.A.; Alzheimer's Disease Neuroimaging Initiative (2019). Cholecystokinin and Alzheimer's disease neuroimaging. *Neurobiol. Aging* 76, 201–207.
  61. Shibata, N., Kawarai, T., Meng, Y., Lee, J.H., Lee, H.S., Wakutani, Y., Shibata, E., Pathan, N., Bi, A., Sato, C., et al. (2007). Association studies between the plasmin genes and late-onset Alzheimer's disease. *Neurobiol. Aging* 28, 1041–1043.
  62. Cao, W., and Konsolaki, M. (2011). FKBP immunophilins and Alzheimer's disease: a chaperoned affair. *J. Biosci.* 36, 493–498.
  63. Hur, J.Y., Frost, G.R., Wu, X., Crump, C., Pan, S.J., Wong, E., Barros, M., Li, T., Nie, P., Zhai, Y., et al. (2020). The innate immunity protein IFITM3 modulates gamma-secretase in Alzheimer's disease. *Nature* 586, 735–740.
  64. Roy, E.R., Wang, B., Wan, Y.W., Chiu, G., Cole, A., Yin, Z., Propson, N.E., Xu, Y., Jankowsky, J.L., Liu, Z., et al. (2020). Type I interferon response drives neuroinflammation and synapse loss in Alzheimer disease. *J. Clin. Invest.* 130, 1912–1930.
  65. Coulon, P.G., Dhanushkodi, N., Prakash, S., Srivastava, R., Roy, S., Alomari, N.I., Nguyen, A.M., Warsi, W.R., Ye, C., Carlos-Cruz, E.A., et al. (2019). NLRP3, NLRP12, and IFI16 inflammasomes induction and caspase-1 activation triggered by virulent HSV-1 strains are associated with severe corneal inflammatory herpetic disease. *Front. Immunol.* 10, 1631.
  66. Reiken, S., Sittenfeld, L., Dridi, H., Liu, Y., Liu, X., and Marks, A.R. (2022). Alzheimer's-like signaling in brains of COVID-19 patients. *Alzheimers Dement.* 18, 955–965.
  67. Luna-Viramontes, N.I., Campa-Córdoba, B.B., Ontiveros-Torres, M.Á., Harrington, C.R., Villanueva-Fierro, I., Guadarrama-Ortiz, P., Garcés-Ramírez, L., de la Cruz, F., Hernandez-Alejandro, M., Martínez-Robles, S., et al. (2020). PHF-core tau as the potential initiating event for tau pathology in Alzheimer's disease. *Front. Cell. Neurosci.* 14, 247.
  68. Ward, S.M., Himmelstein, D.S., Lancia, J.K., and Binder, L.I. (2012). Tau oligomers and tau toxicity in neurodegenerative disease. *Biochem. Soc. Trans.* 40, 667–671.
  69. Martinisi, A., Flach, M., Sprenger, F., Frank, S., Tolnay, M., and Winkler, D.T. (2021). Severe oligomeric tau toxicity can be reversed without long-term sequelae. *Brain* 144, 963–974.
  70. Shafiei, S.S., Guerrero-Muñoz, M.J., and Castillo-Carranza, D.L. (2017). Tau oligomers: cytotoxicity, propagation, and mitochondrial damage. *Front. Aging Neurosci.* 9, 83.
  71. Blair, L.J., Frauen, H.D., Zhang, B., Nordhues, B.A., Bijan, S., Lin, Y.C., Zamudio, F., Hernandez, L.D., Sabbagh, J.J., Selenica, M.L.B., and Dickey, C.A. (2015). Tau depletion prevents progressive blood-brain barrier damage in a mouse model of tauopathy. *Acta Neuropathol. Commun.* 3, 8.
  72. Wang, F., Xu, J., Xu, S.J., Guo, J.J., Wang, F., and Wang, Q.W. (2022). Analysis and identification genetic effect of SARS-CoV-2 infections to Alzheimer's disease patients by integrated bioinformatics. *J. Alzheimers Dis.* 85, 729–744.

73. Das, M., Penn, C., Martinez, T., Mayilsamy, K., McGill, A., Wiling, A., Mohapatra, S.S., and Mohapatra, S. (2020). COVID-19 neurotropism and implications for therapy. *Neuroimmunol. Neuroinflamm.* 7, 141–149.
74. Rutkai, I., Mayer, M.G., Hellmers, L.M., Ning, B., Huang, Z., Monjure, C.J., Coyne, C., Silvestri, R., Golden, N., Hensley, K., et al. (2022). Neuropathology and virus in brain of SARS-CoV-2 infected non-human primates. *Nat. Commun.* 13, 1745.
75. Palomer, E., Buechler, J., and Salinas, P.C. (2019). Wnt signaling deregulation in the aging and Alzheimer's brain. *Front. Cell. Neurosci.* 13, 227.
76. Seaks, C.E., and Wilcock, D.M. (2020). Infectious hypothesis of Alzheimer disease. *PLoS Pathog.* 16, e1008596.
77. Abbott, A. (2020). Are infections seeding some cases of Alzheimer's disease? *Nature* 587, 22–25.
78. Twohig, D., and Nielsen, H.M. (2019). alpha-synuclein in the pathophysiology of Alzheimer's disease. *Mol. Neurodegener.* 14, 23.
79. Haass, C., Kaether, C., Thinakaran, G., and Sisodia, S. (2012). Trafficking and proteolytic processing of APP. *Cold Spring Harb. Perspect. Med.* 2, a006270.
80. Winslow, A.R., Moussaud, S., Zhu, L., Post, K.L., Post, K.L., Dickson, D.W., Berezovska, O., and McLean, P.J. (2014). Convergence of pathology in dementia with Lewy bodies and Alzheimer's disease: a role for the novel interaction of alpha-synuclein and presenilin 1 in disease. *Brain* 137, 1958–1970.
81. Kaneko, H., Kakita, A., Kasuga, K., Nozaki, H., Ishikawa, A., Miyashita, A., Kuwano, R., Ito, G., Iwatsubo, T., Takahashi, H., et al. (2007). Enhanced accumulation of phosphorylated alpha-synuclein and elevated beta-amyloid 42/40 ratio caused by expression of the presenilin-1 deltaT440 mutant associated with familial Lewy body disease and variant Alzheimer's disease. *J. Neurosci.* 27, 13092–13097.
82. Benjamini, Y., and Hochberg, Y. (1995). Controlling the false discovery rate: a practical and powerful approach to multiple testing. *J. Roy. Stat. Soc. B* 57, 289–300.

**OMTM, Volume 27**

**Supplemental information**

**SARS-CoV-2 infection increases**

**the gene expression profile**

**for Alzheimer's disease risk**

**Ryan Green, Karthick Mayilsamy, Andrew R. McGill, Taylor E. Martinez, Bala Chandran, Laura J. Blair, Paula C. Bickford, Shyam S. Mohapatra, and Subhra Mohapatra**

## Supplementary Methods and Figures

### Immune cell profiling with CIBERSORT

To estimate the relative percentage of different immune cell types in COVID-19 brains compared to control, we used CIBERSORTx. CIBERSORTx is an analytical tool that provides an estimation of the abundances of member cell types in a mixed cell population using gene expression data. Mapped read counts for each patient sample were input into CIBERSORT along with the standard “LM22” gene signature file. CIBERSORT output is displayed as fractional proportions of each immune cell sub-population as well as the overall proportion of immune cells within each sample.

**Table S1** Differentially expressed genes depicted in figure 1C.

Please see supplementary spreadsheet file for table S1.

**Table S2** Fold change and p value of ADRD pathology genes in COVID-19 brains

| Gene     | log(fold change) | Adj p value |
|----------|------------------|-------------|
| CTCF     | 1.239            | 2.43E-03    |
| CXCL8    | 1.129            | 7.31E-03    |
| IFITM3   | 1.075            | 1.85E-03    |
| LGALS3   | 1.071            | 3.66E-04    |
| IFI16    | 1.026            | 5.21E-04    |
| C4A/C4B  | 0.963            | 2.36E-02    |
| FKBP5    | 0.938            | 1.89E-03    |
| C5AR1    | 0.913            | 2.91E-02    |
| IL18     | 0.864            | 4.41E-03    |
| GFAP     | 0.832            | 1.61E-02    |
| PLAT     | 0.806            | 1.39E-02    |
| C4B_2    | 0.79             | 4.93E-02    |
| IL6R     | 0.786            | 2.52E-02    |
| CAV1     | 0.733            | 3.84E-02    |
| KLF4     | 0.706            | 4.93E-02    |
| STAT3    | 0.611            | 3.89E-02    |
| EGFR     | 0.521            | 2.51E-02    |
| HSP90AB1 | -0.41            | 2.68E-02    |
| HSP90AA1 | -0.431           | 2.09E-02    |
| APP      | -0.468           | 4.31E-03    |
| CALB1    | -0.572           | 3.20E-02    |
| HSPA8    | -0.579           | 3.07E-03    |
| CCKBR    | -0.77            | 1.59E-02    |
| BDNF     | -0.824           | 3.14E-02    |
| CAMKK2   | -0.858           | 2.99E-04    |
| TAC1     | -1.424           | 5.14E-07    |

**Table S3** Hub genes identified in protein interaction network of COVID brain samples using STRING database and CytoHubba.

| Matching Algorithms | Gene     |
|---------------------|----------|
| 3                   | CCL2     |
| 3                   | CXCL8    |
| 3                   | NFKBIA   |
| 3                   | PTPRC    |
| 3                   | STAT1    |
| 3                   | STAT3    |
| 3                   | TLR2     |
| 2                   | APP      |
| 2                   | CAV1     |
| 2                   | CXCL2    |
| 2                   | EGFR     |
| 2                   | EZH2     |
| 2                   | HRAS     |
| 2                   | HSP90AA1 |
| 2                   | HSP90AB1 |
| 2                   | ITGB1    |
| 2                   | LRRK2    |
| 2                   | MYC      |
| 2                   | SMARCA4  |



**Table S4.** qPCR Primer Sequences

|    | Gene                 | Forward Primer           | Reverse primer          |
|----|----------------------|--------------------------|-------------------------|
| 1  | SARS-CoV-2 N protein | CACATTGGCACCCGCAATC      | GAGGAACGAGAAGAGGCTTG    |
| 2  | IL-6                 | TACCACTTCACAAGTCGGAGGC   | CTGCAAGTGCATCATCGTTGTTC |
| 3  | IL-1 $\beta$         | TGGACCTTCCAGGATGAGGACA   | GTTTCATCTCGGAGCCTGTAGTG |
| 4  | TNF $\alpha$         | GGTGCCTATGTCTCAGCCTCTT   | GCCATAGAACTGATGAGAGGGAG |
| 5  | CCL20                | ATGGCCTGCGGTGGCAAGCGTCTG | TAGGCTGAGGAGGTTACAGCCCT |
| 6  | NLRP3                | TCACAACTCGCCCAAGGAGGAA   | AAGAGACCACGGCAGAAGCTAG  |
| 7  | IFITM3               | TTCTGCTGCCTGGGCTTCATAG   | ACCAAGGTGCTGATGTTTCAGGC |
| 8  | CR1                  | ATGAAAGGAGCCAGCAGTGTGC   | GGAATCCACTCATCTCCTGAGG  |
| 9  | FKBP5                | GATTGCCGAGATGTGGTGTTTCG  | GGCTTCTCCAAAACCATAGCGTG |
| 10 | C5AR1                | CCATTAGTGCCGACCGTTTCCT   | CACGAAGGATGGAATGGTGAGG  |
| 11 | IFI 204              | CCAGTCACCAATACTCCACAGC   | CTCTGAGTGGAGAACAGCACCT  |

**Table S5.** Primary antibodies, corresponding secondary antibodies, and associated information

| Primary antibody                    | Source                          | Catalogue number | Dilution | Secondary antibody                                      | Source                                           | Catalogue number   | Dilution      | Development       |
|-------------------------------------|---------------------------------|------------------|----------|---------------------------------------------------------|--------------------------------------------------|--------------------|---------------|-------------------|
| Anti-Tau (phospho T231) antibody    | Abcam, Cambridge, MA            | ab151559         | 1-100    | Biotinylated goat antirabbit/Alexafluor 488 anti rabbit | Vector Laboratories Inc., / Abcam, Cambridge, MA | BA-1000/ /AB150077 | 1:400/ 1-1000 | DAB/ Fluorescence |
| Anti-Tau (T22), oligomeric Antibody | Millipore, Temecula, California | ABN454           | 1-200    | Biotinylated goat antirabbit                            | Vector Laboratories Inc.,                        | BA-1000            | 1:400         | DAB               |
| Anti-FKBP5 antibody                 | R&D systems                     | AF4094           | 1-300    | Biotinylated swine antigoat                             | Southern Biotech                                 | Biotech 4050-08    | 1-500         | DAB               |
| Anti-CD31 antibody                  | Invitrogen                      | 14-0311-82       | 1-500    | Goat Anti-Rat IgG H&L (Alexa Fluor® 594)                | Abcam, Cambridge, MA                             | ab150160           | 1-1000        | Fluorescence      |
| Caspase 1 p20 (Cleaved Asp296)      | Thermo Scientific               | PA599390         | 1-250    | Alexafluor 594 anti rabbit                              | Abcam, Cambridge, MA                             | A32740             | 1:400/ 1-1000 | Fluorescence      |

Figure S1

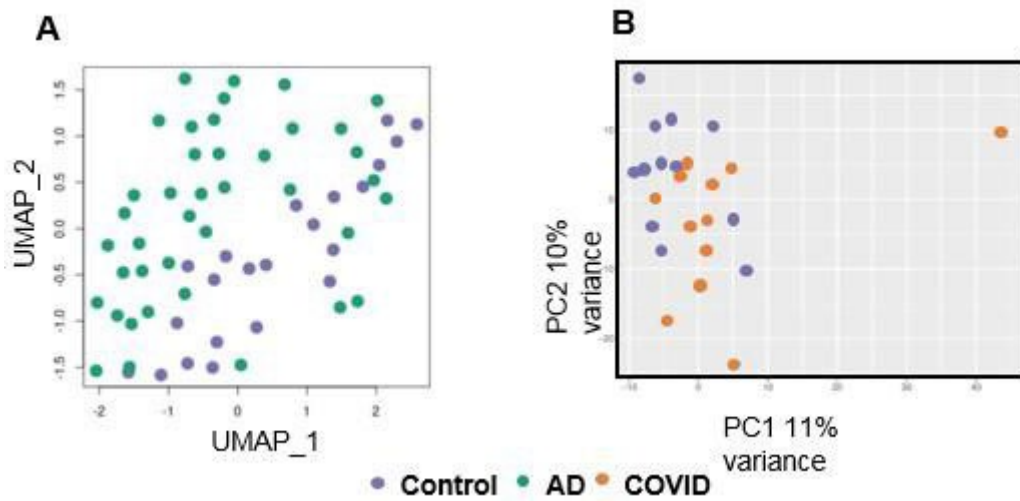

**Figure S1. Dimensionality reduction and clustering of individual patient samples.** **A.** Uniform Manifold Approximation and Projection (UMAP) clustering of individual AD vs control sample. **B.** Principle component (PC) clustering of individual COVID-19 vs control samples.

Figure S2.

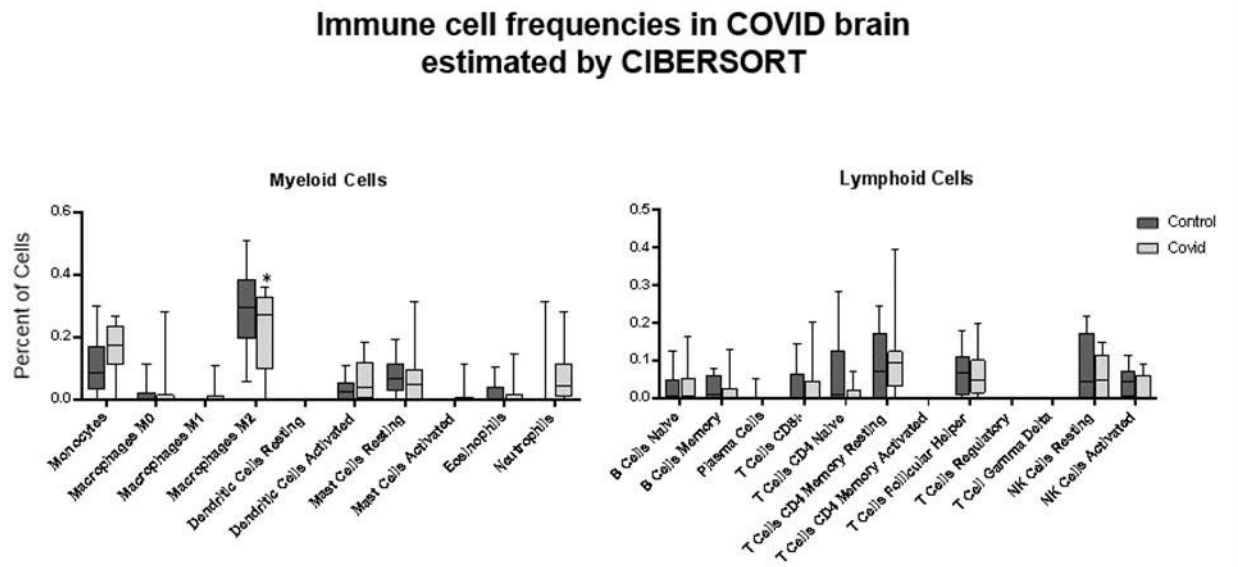

**Figure S2.** Immune cell types present in COVID and control brains as estimated from sequencing data with CIBERSORT.

Figure S3

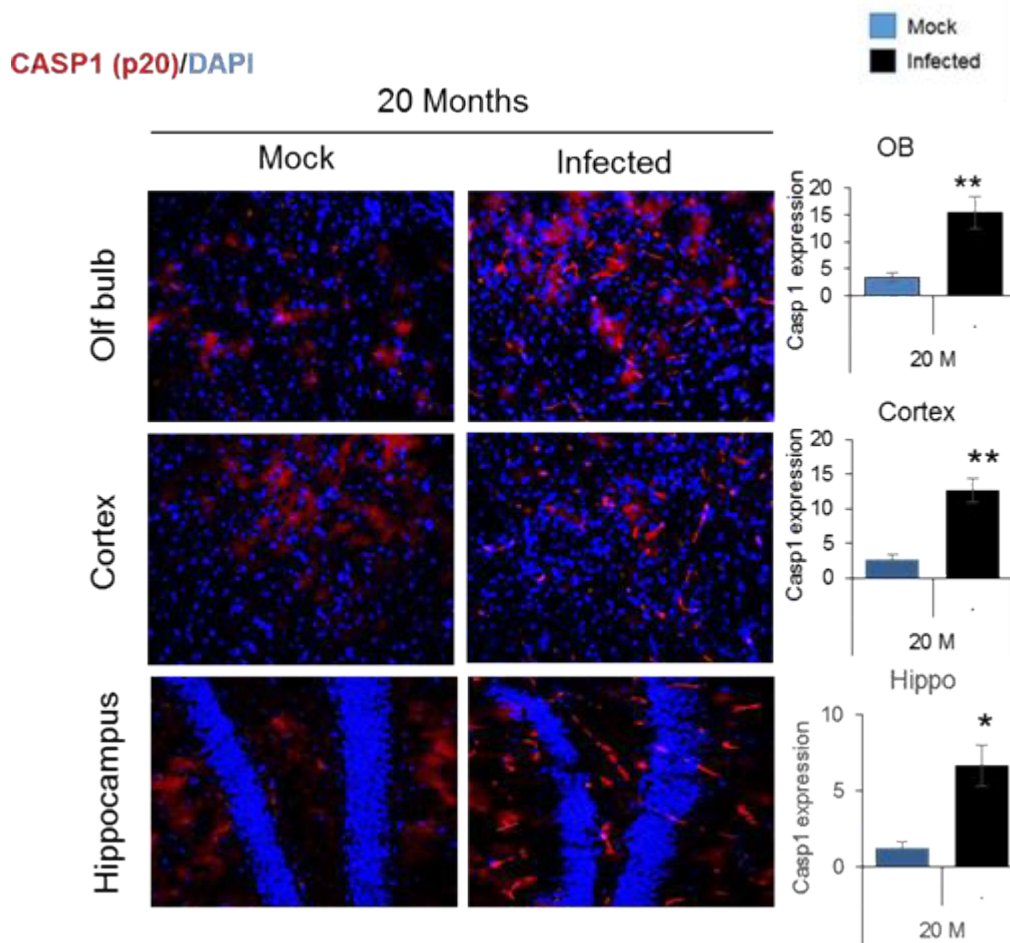

**Figure S3. SARS-CoV-2 infection induces Casp1(p20) expression in Aged Mice.** Immunostaining and Histogram showing Caspase1 expression in infected brain –olfactory bulb, cortex, hippocampus, n=3/ group, data expressed as mean ± SEM, \* Compared to respective mock, \* $p < 0.05$ , \*\* $p < 0.005$

## Figure S4

Figure S4

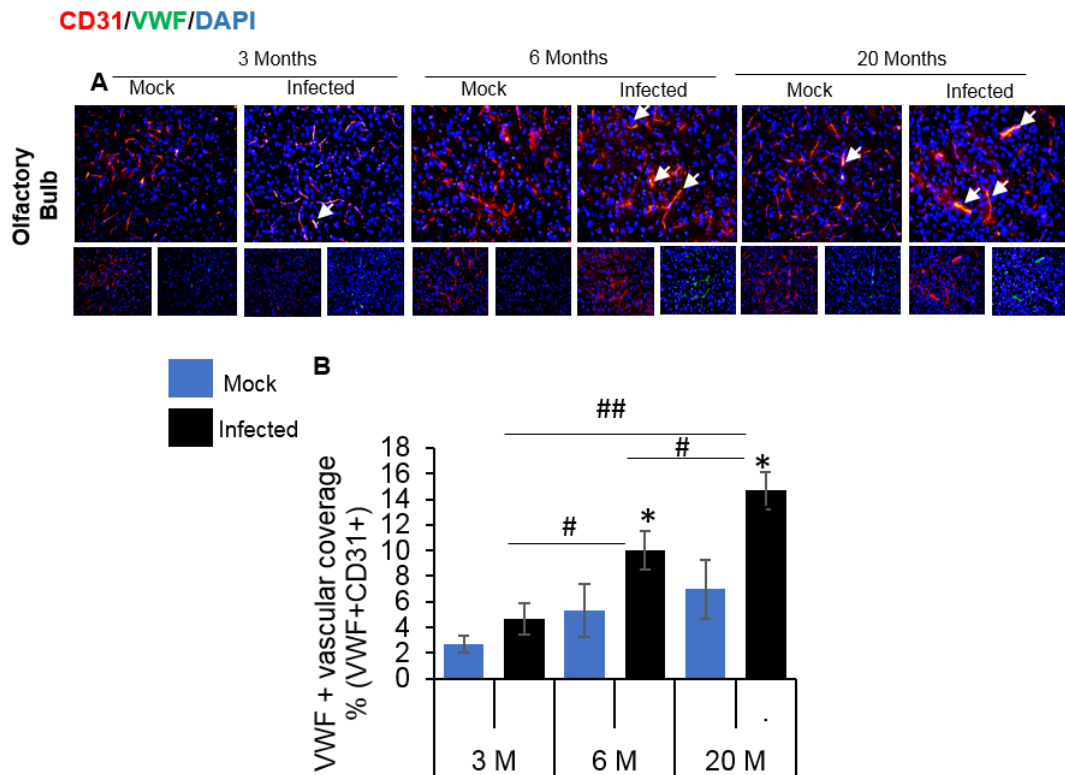

**Figure S4. CD31 and VWF staining of MA10 infected mouse brains: C57Bl/6 3, 6 and 20 month old mice were infected with SARS CoV2 MA10 virus- 100k PFU. A.** Representative images showing the expression of CD31 (marker for endothelial cells) and VWF (von Willebrand factor marker for vascular damage) in olfactory bulb. Upper panel: co localization of CD31 (RFP) and VWF (GFP) depicting vascular damage shown by arrows, lower panel: CD31 (RFP) and VWF (GFP). **B.** Histogram representing the quantification of VWF+ vascular coverage (% VWF expression with respect to CD31 expression).  $n = 3$ , Data expressed as mean  $\pm$  SEM, \* Compared to control  $p < 0.05$ , ##,  $p < 0.005$ ,

**Figure S5**

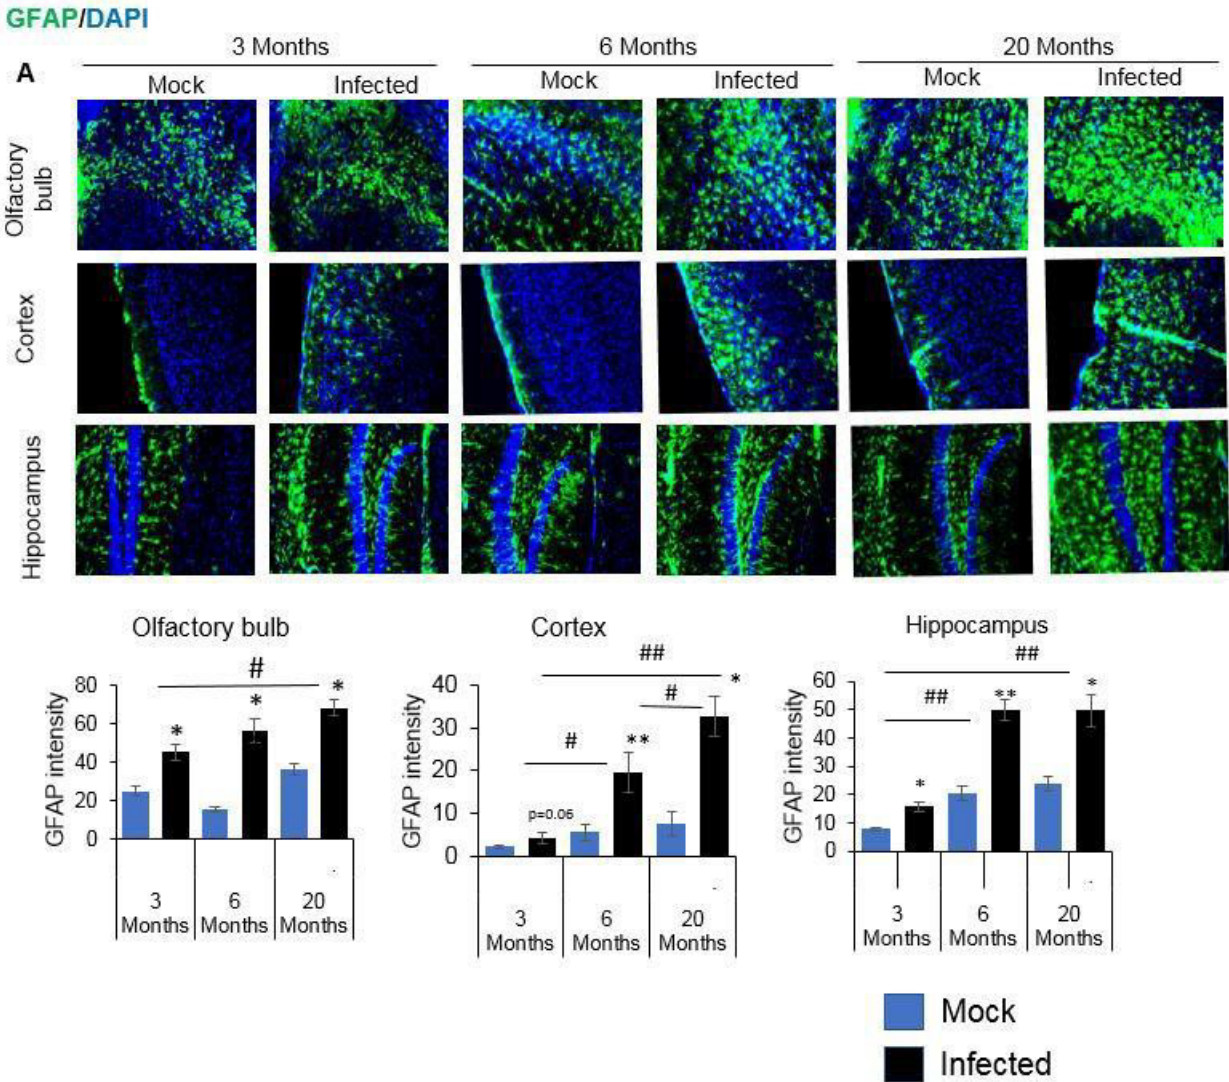

**Figure S5. SARS-CoV-2 MA 10 infection induces gliosis in olfactory bulb, cortex and hippocampus of 6 and 20 Months aged mice. A.** Immunostaining showing GFAP/DAPI staining in infected brain – olfactory bulb (upper panel), cortex (middle panel) and hippocampus (lower panel) at 18 DPI, **B.** histogram representing quantification of GFAP immunoreactivity (Intden/unit area), n=3/ group, data expressed as mean ± SEM, \* Compared to respective mock, # Compared to infection \*,#p<0.05, \*\*,## p<0.005

**Figure S6**

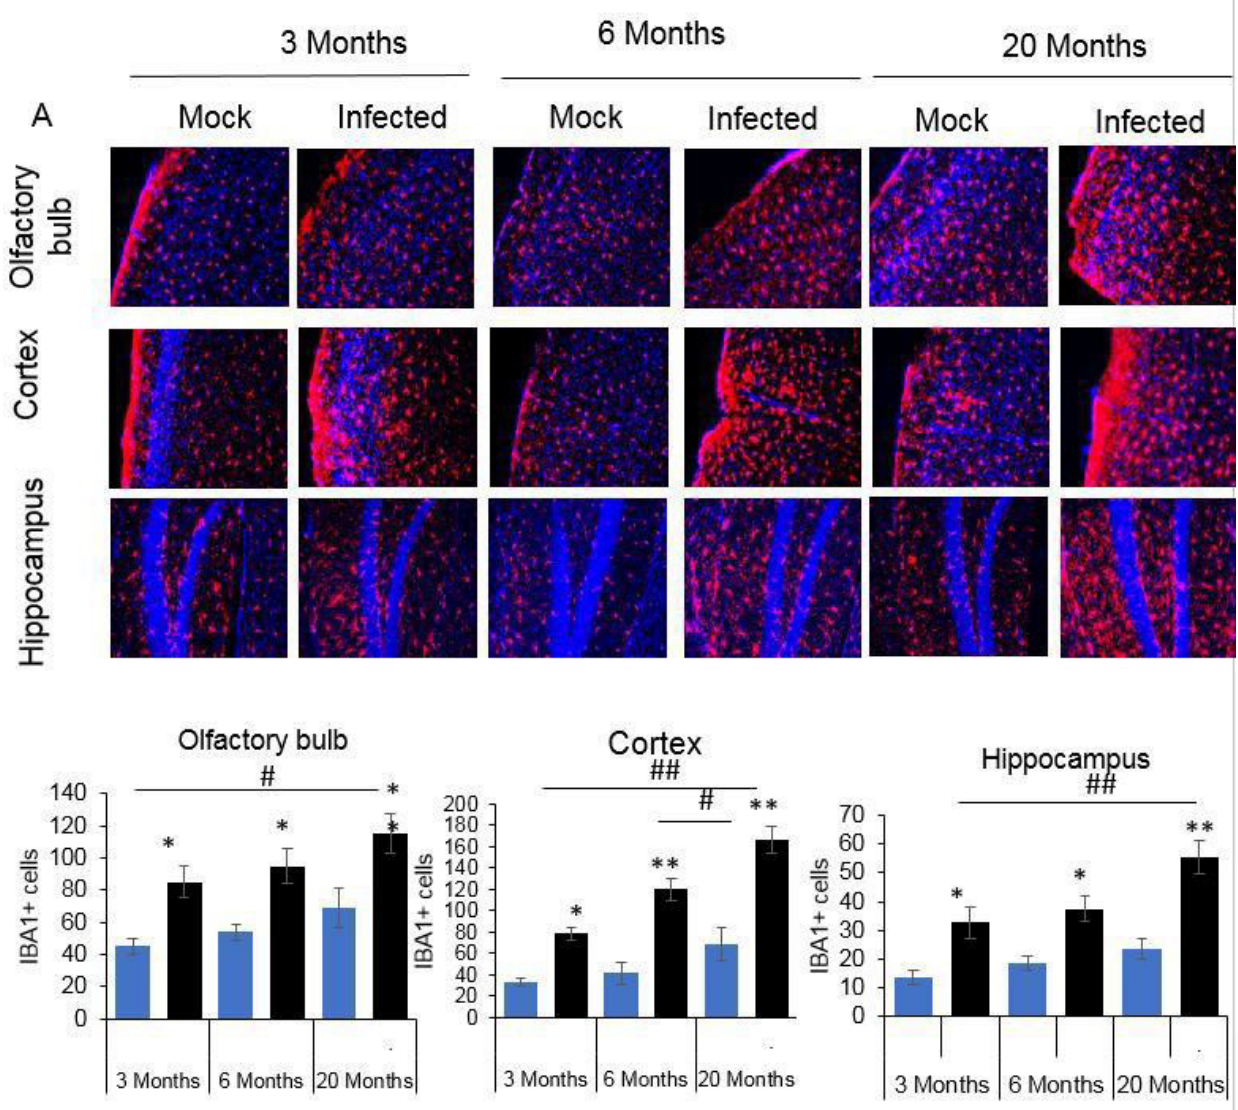

**Figure S6. SARS-CoV-2 MA 10 infection induces gliosis in olfactory bulb, cortex and hippocampus of 6 and 20 Months aged mice. A.** Immunostaining showing IBA1 (red)/DAPI staining in infected brain – olfactory bulb (upper panel), cortex (middle panel) and hippocampus (lower panel), at 18 DPI, **B.** histogram representing quantification of IBA1+ cells , n=3/ group, data expressed as mean ± SEM, \* Compared to respective mock, # Compared to infection \*, p<0.05, \*\*, ## p<0.005,\*\*\*,

**Figure S7**

**MBP staining**

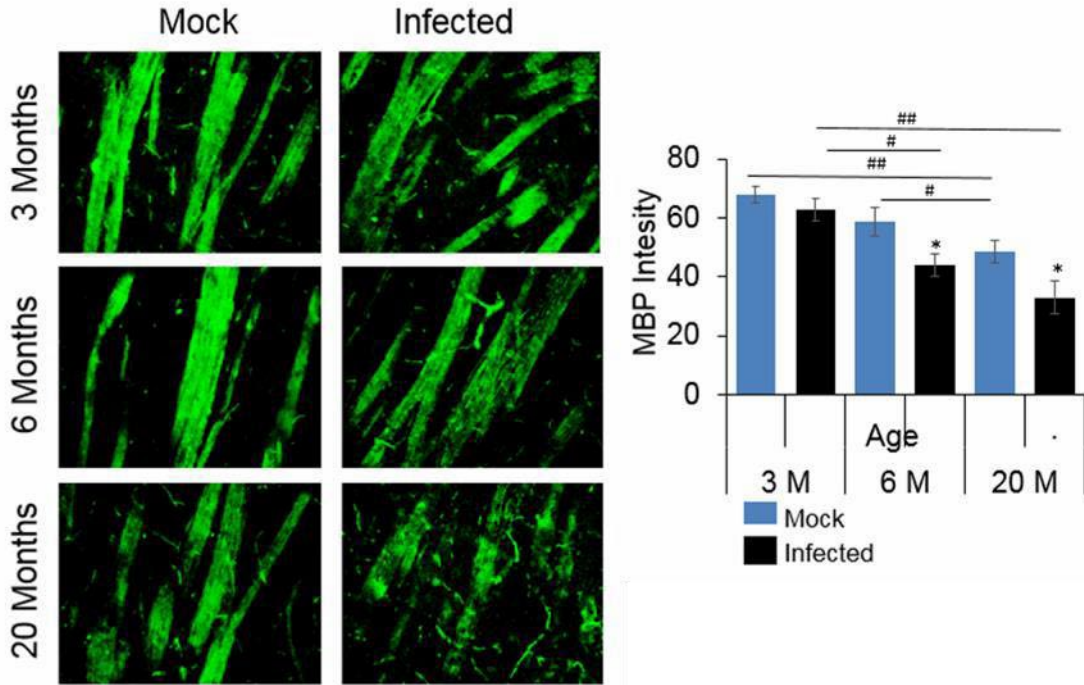

**Figure S7. SARS-CoV-2 infection induces demyelination in Aged Mice.** 3, 6 and 20 months aged C57Bl/6 mice were infected with SARS CoV2 MA10 virus- 100k PFU. The infected mice were sacrificed 18 days post infection. **A.** Immunostaining showing MBP staining in infected brain – Striatum, **B.** quantification of immunostaining (MBP intensity), n=3/ group, data expressed as mean ± SEM, \* Compared to respective mock, # Compared to infection \*, p<0.05, \*\*, ## p<0.005



**Figure S8**

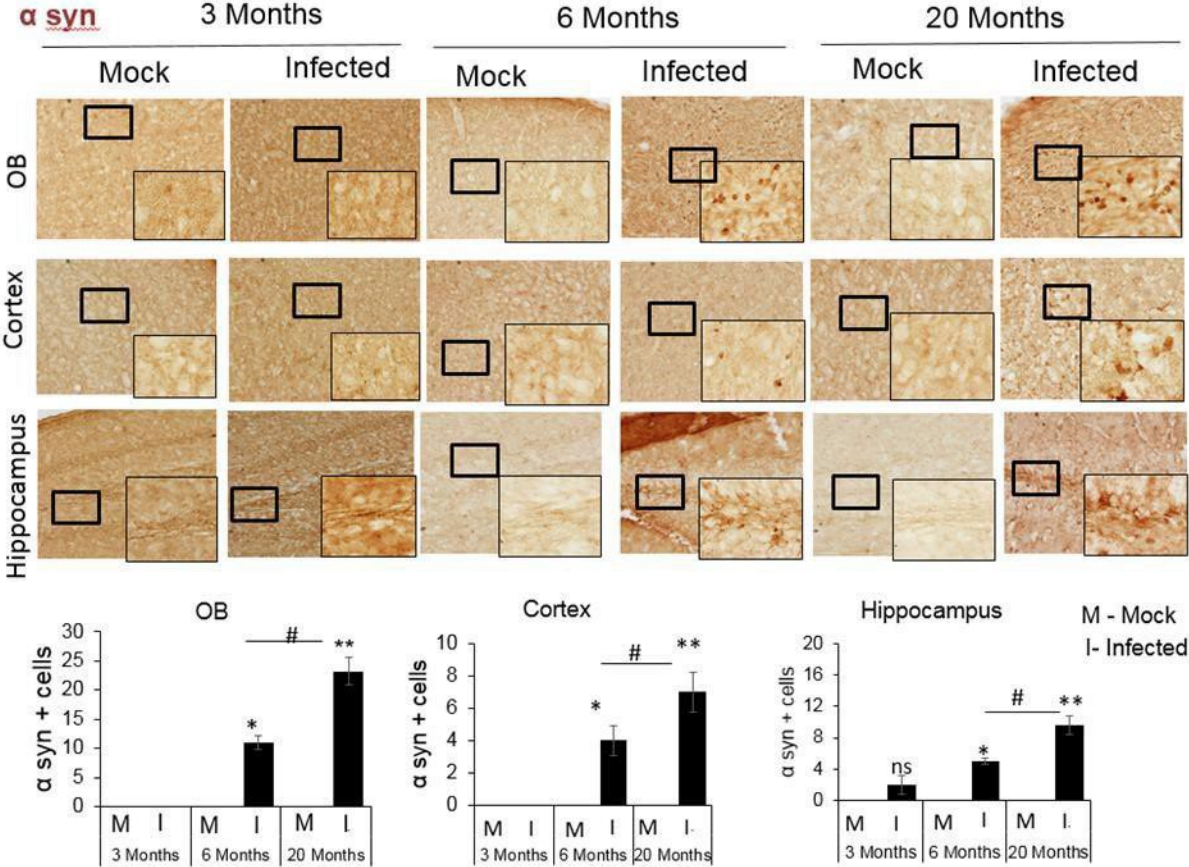

**Figure S8. SARS-CoV-2 infection induces α-synuclein expression in Aged Mice.** 3, 6 and 20 month old C57Bl/6 mice were infected with SARS CoV2 MA10 virus, Immunostaining showing aSyn staining in infected brain – olfactory bulb, cortex and hippocampus, quantification of immunostaining at 18 DPI, n=3/ group, data expressed as mean ± SEM, \* Compared to respective mock, # Compared to infection \*, # p<0.05
